# Supplementary material
Source: PubMed Central journal article supplement (PMC5937698)
Supplement: NIHMS962314-supplement-Suppl_Figs.pdf [file NIHMS962314-supplement-Suppl_Figs.pdf]

## Supporting Information

### Dynamic phosphorylation of apoptosis signal regulating kinase 1 (ASK1) in response to oxidative and electrophilic stress

<sup>1</sup>Carlos Morales Betanzos\*, <sup>1</sup>Joel D. Federspiel\*, <sup>2</sup>Amy M. Palubinsky, <sup>3</sup>BethAnn McLaughlin, and <sup>1</sup>Daniel C. Liebler

<sup>1</sup>Department of Biochemistry, Vanderbilt University School of Medicine, <sup>2</sup>Neuroscience Graduate Program, Vanderbilt Brain Institute, Vanderbilt University, <sup>3</sup>Department of Neurology, Vanderbilt University, Nashville, Tennessee 37232

Address correspondence to:  
Daniel C. Liebler, Ph. D.  
Vanderbilt University School of Medicine  
607 Light Hall  
2215 Garland Avenue  
Nashville, TN 37232-0146  
Email: daniel.liebler@vanderbilt.edu

\*These authors contributed equally to this work

---

#### Table of contents

**Figure S1.** Annotated MS/MS spectra for each manually validated phosphopeptide.

**Figure S2.** Graphs of all detected and quantified ASK1 phosphopeptides in the HNE treated cells.

**Figure S3.** Graphs of all detected and quantified ASK1 phosphopeptides in the H<sub>2</sub>O<sub>2</sub> treated cells.

Figure S1. Annotated MS/MS spectra for each manually validated phosphopeptide. Where possible, the phosphorylation was localized to a single residue. When this was not possible with the data at hand, the phosphorylation was localized to the fewest possible sites with sufficient explanatory evidence. Each page lists the peptide sequence, site(s) of modification, MS1 isolation window, precursor mass accuracy, annotated MS/MS spectrum, and a table summarizing the identified peaks for the MS/MS spectrum.

# <sup>79</sup>GRGS[79.96633]SVGGGSR<sup>89</sup>

**Ser 82/83**

Precursor m/z: 528.7345

Precursor mass error: 5.20 ppm

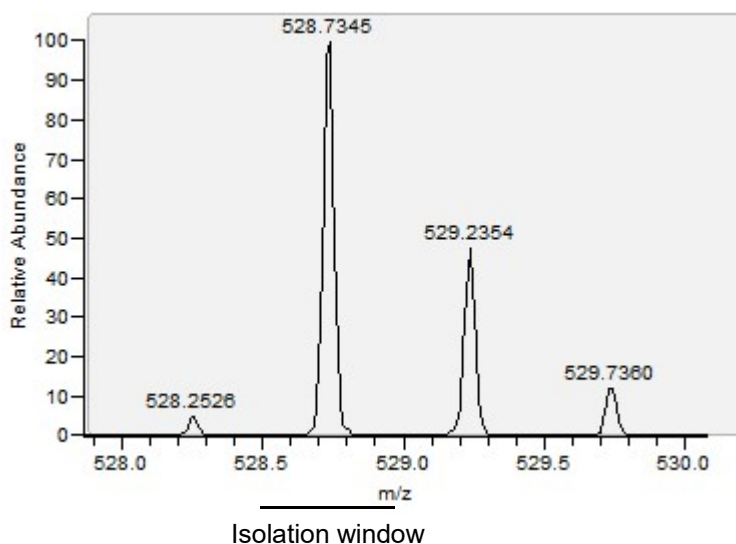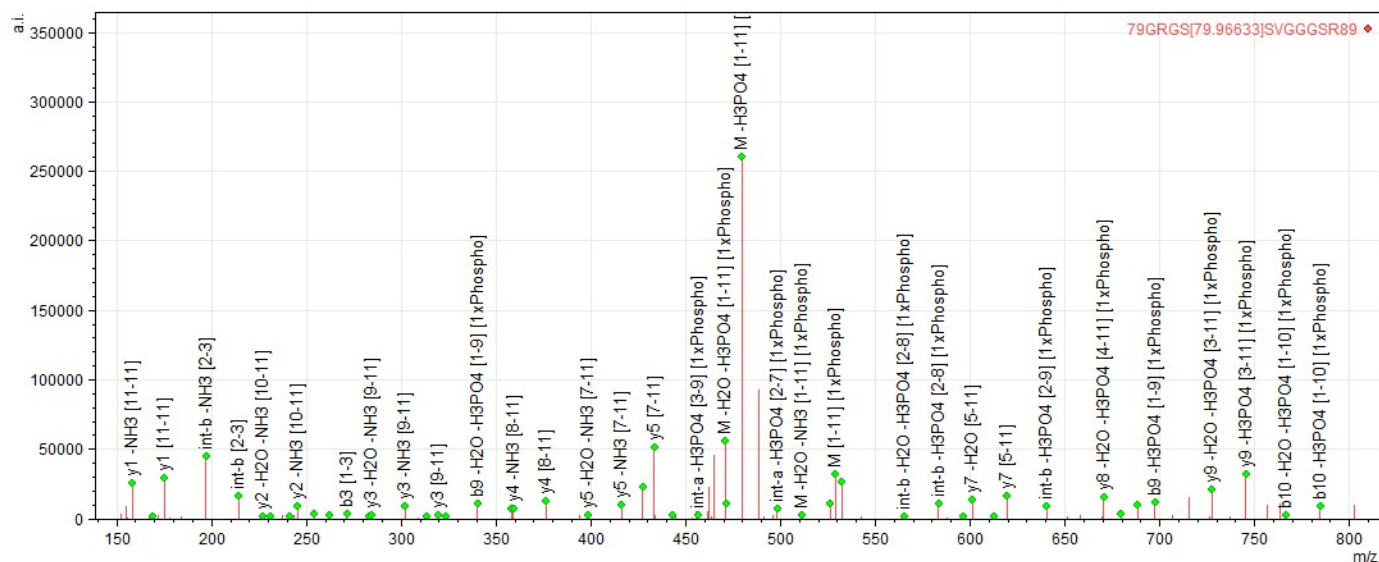

| parameter                             | value                |
|---------------------------------------|----------------------|
| Number of peaks searched              | 90                   |
| Number of fragments searched          | 756                  |
| Number of fragments matched           | 63                   |
| Intensity matched                     | 74 %                 |
| Sequence length                       | 11                   |
| Ion serie matches for "b"             | 2, 3                 |
| Ion serie matches for "b -H2O"        |                      |
| Ion serie matches for "b -H2O -H3PO4" | 7, 7, 9, 9, 10       |
| Ion serie matches for "b -H2O -NH3"   |                      |
| Ion serie matches for "b -H3PO4"      | 4, 5, 6, 7, 8, 9, 10 |
| Ion serie matches for "b -NH3"        | 2, 3                 |
| Ion serie matches for "b -NH3 -H3PO4" | 4                    |
| Ion serie matches for "y"             | 1, 2, 3, 4, 5, 6, 7  |
| Ion serie matches for "y -H2O"        | 4, 7                 |
| Ion serie matches for "y -H2O -H3PO4" | 8, 9                 |
| Ion serie matches for "y -H2O -NH3"   | 2, 3, 5              |
| Ion serie matches for "y -H3PO4"      | 8, 9                 |
| Ion serie matches for "y -NH3"        | 1, 2, 3, 4, 5        |
| Ion serie matches for "y -NH3 -H3PO4" | 10                   |

Figure S1.

<sup>79</sup>GRGSS[79.96633]VGGGSRR<sup>90</sup>

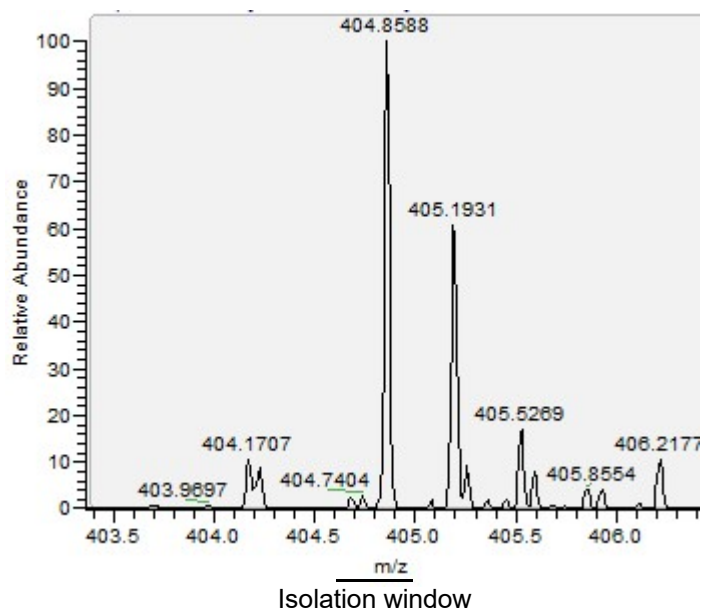

Ser 82/83

Precursor m/z: 404.8588

Precursor mass error: -2.06 ppm

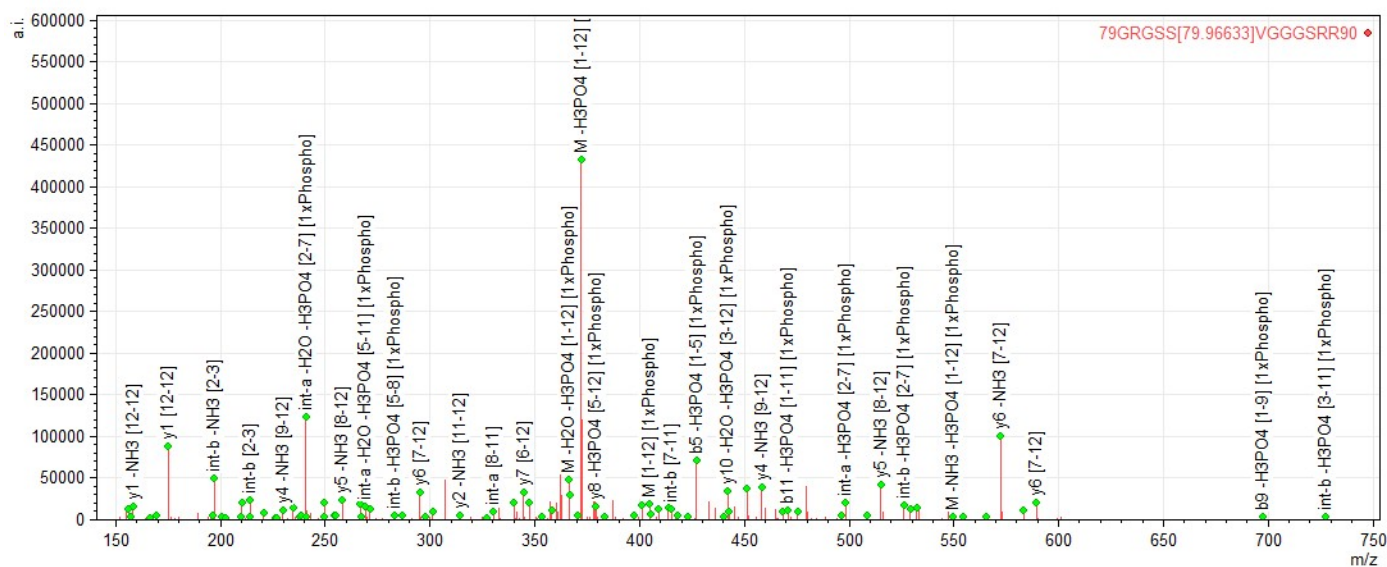

| parameter                             | value                           |
|---------------------------------------|---------------------------------|
| Number of peaks searched              | 186                             |
| Number of fragments searched          | 1485                            |
| Number of fragments matched           | 114                             |
| Intensity matched                     | 64 %                            |
| Sequence length                       | 12                              |
| Ion serie matches for "b"             | 2, 3, 4                         |
| Ion serie matches for "b -H2O"        | 4                               |
| Ion serie matches for "b -H2O -H3PO4" | 5, 6, 6, 7, 7, 9, 9             |
| Ion serie matches for "b -H2O -NH3"   |                                 |
| Ion serie matches for "b -H3PO4"      | 5, 6, 7, 9, 11                  |
| Ion serie matches for "b -NH3"        | 2, 3, 8                         |
| Ion serie matches for "b -NH3 -H3PO4" |                                 |
| Ion serie matches for "y"             | 1, 2, 3, 3, 4, 4, 5, 5, 6, 6, 7 |
| Ion serie matches for "y -H2O"        | 3                               |
| Ion serie matches for "y -H2O -H3PO4" | 9, 10                           |
| Ion serie matches for "y -H2O -NH3"   | 3, 4, 4, 5, 6, 7                |
| Ion serie matches for "y -H3PO4"      | 8, 9, 10, 10, 11, 11            |
| Ion serie matches for "y -NH3"        | 1, 2, 3, 4, 4, 5, 5, 6, 6       |
| Ion serie matches for "y -NH3 -H3PO4" | 8, 10, 11                       |

Figure S1.

# <sup>81</sup>GS[79.96633]SVGGGR<sup>89</sup>

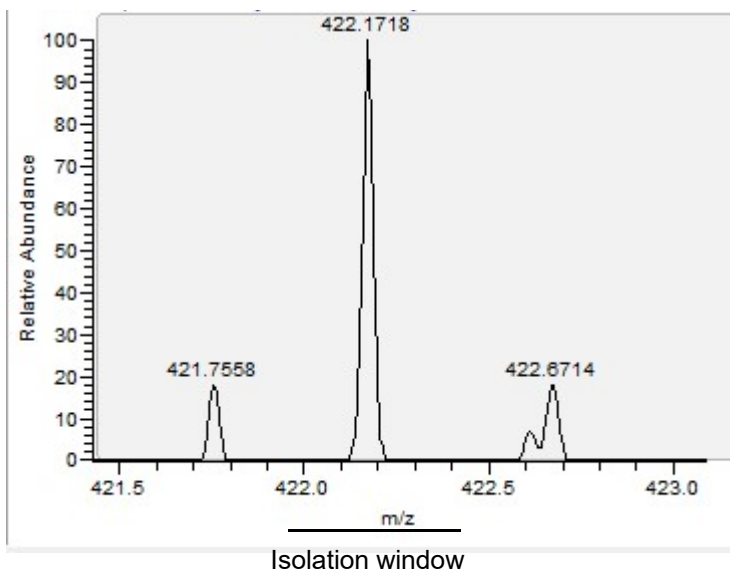

Ser 82/83

Precursor m/z: 422.1718

Precursor mass error: -0.83 ppm

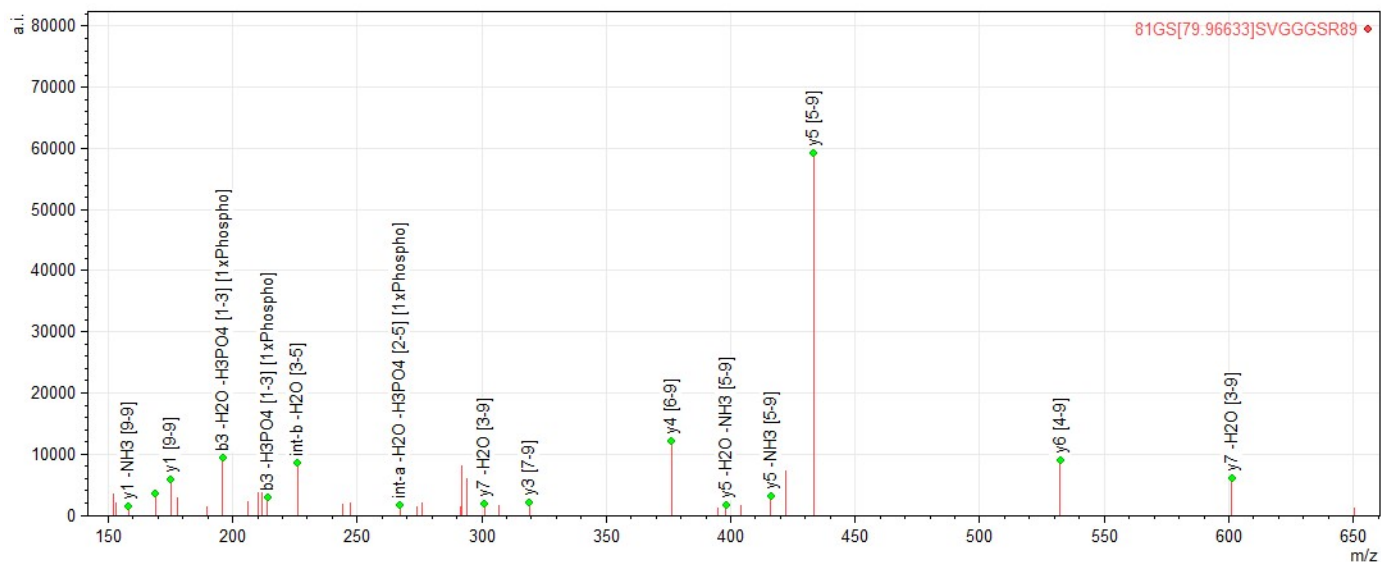

| parameter                             | value         |
|---------------------------------------|---------------|
| Number of peaks searched              | 39            |
| Number of fragments searched          | 356           |
| Number of fragments matched           | 16            |
| Intensity matched                     | 62 %          |
| Sequence length                       | 9             |
| Ion serie matches for "b"             |               |
| Ion serie matches for "b -H2O"        |               |
| Ion serie matches for "b -H2O -H3PO4" | 3             |
| Ion serie matches for "b -H3PO4"      | 3             |
| Ion serie matches for "y"             | 1, 3, 4, 5, 6 |
| Ion serie matches for "y -H2O"        | 3, 7, 7       |
| Ion serie matches for "y -H2O -H3PO4" |               |
| Ion serie matches for "y -H2O -NH3"   | 5             |
| Ion serie matches for "y -H3PO4"      |               |
| Ion serie matches for "y -NH3"        | 1, 5          |
| Ion serie matches for "y -NH3 -H3PO4" |               |

Figure S1.

<sup>81</sup>GS[79.96633]SVGGGSRR<sup>90</sup>

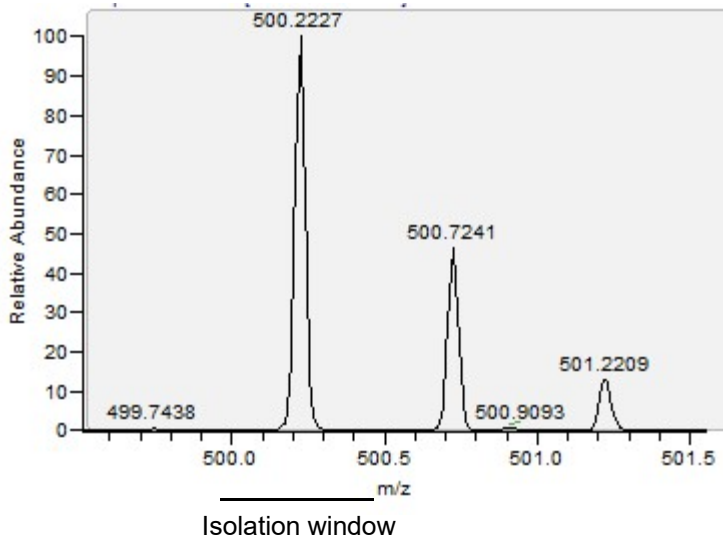

Ser 82/83

Precursor m/z: 500.2227

Precursor mass error: -1.40 ppm

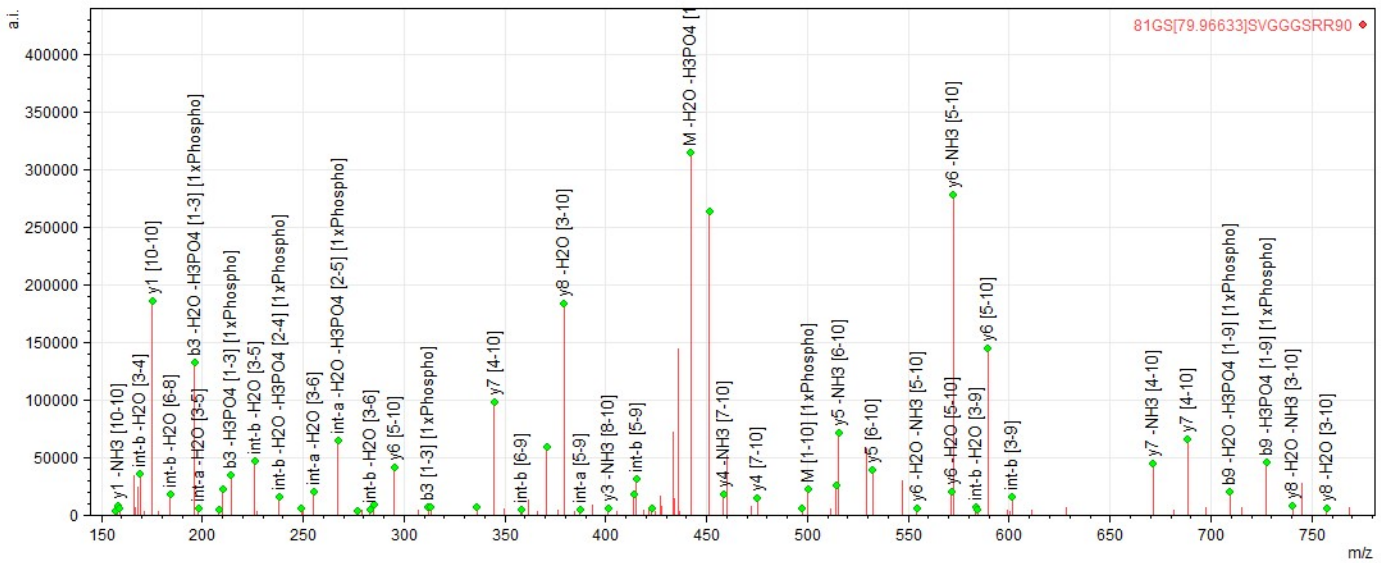

| parameter                             | value               |
|---------------------------------------|---------------------|
| Number of peaks searched              | 97                  |
| Number of fragments searched          | 502                 |
| Number of fragments matched           | 58                  |
| Intensity matched                     | 79 %                |
| Sequence length                       | 10                  |
| Ion serie matches for "b"             | 3                   |
| Ion serie matches for "b -H2O"        |                     |
| Ion serie matches for "b -H2O -H3PO4" | 3, 8, 9             |
| Ion serie matches for "b -H2O -NH3"   |                     |
| Ion serie matches for "b -H3PO4"      | 3, 4, 9             |
| Ion serie matches for "b -NH3"        |                     |
| Ion serie matches for "b -NH3 -H3PO4" |                     |
| Ion serie matches for "y"             | 1, 4, 5, 6, 6, 7, 7 |
| Ion serie matches for "y -H2O"        | 5, 6, 8, 8          |
| Ion serie matches for "y -H2O -H3PO4" | 9                   |
| Ion serie matches for "y -H2O -NH3"   | 5, 5, 6, 8, 8       |
| Ion serie matches for "y -H3PO4"      | 9                   |
| Ion serie matches for "y -NH3"        | 1, 3, 4, 5, 6, 7, 7 |
| Ion serie matches for "y -NH3 -H3PO4" |                     |

Figure S1.



<sup>135</sup>LDFGET[79.96633]TVLDR<sup>145</sup>

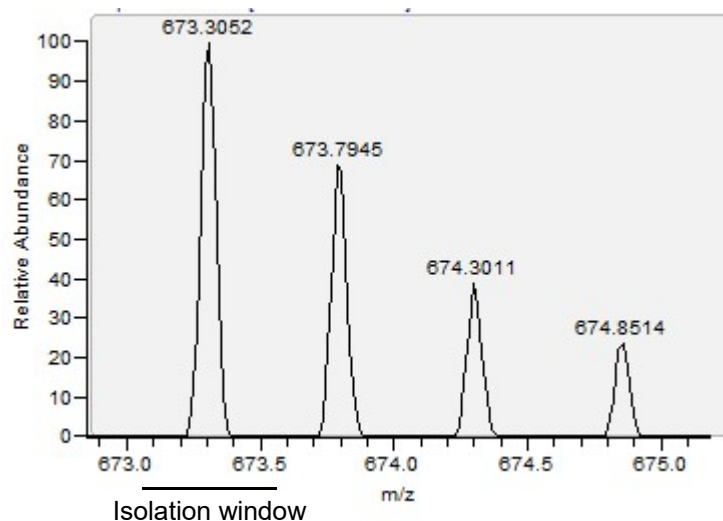

Thr 140/141

Precursor m/z: 673.3052

Precursor mass error: 0.30 ppm

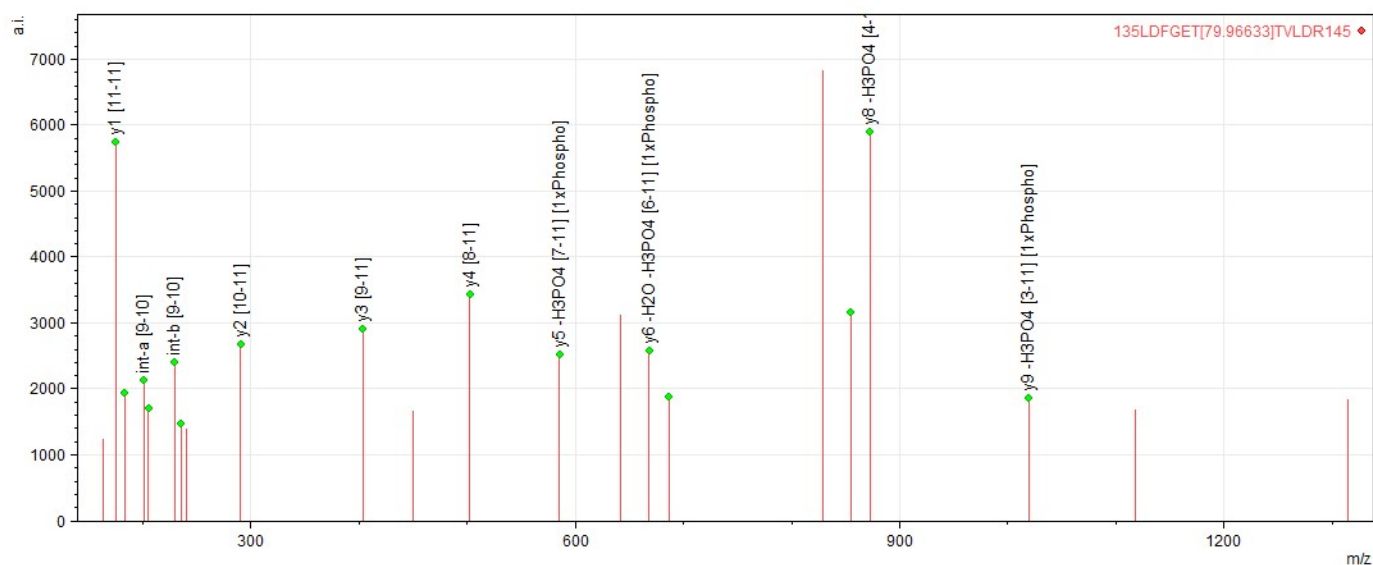

| parameter                             | value      |
|---------------------------------------|------------|
| Number of peaks searched              | 22         |
| Number of fragments searched          | 684        |
| Number of fragments matched           | 19         |
| Intensity matched                     | 70 %       |
| Sequence length                       | 11         |
| Ion serie matches for "b"             | 2          |
| Ion serie matches for "b -H2O"        |            |
| Ion serie matches for "b -H2O -H3PO4" |            |
| Ion serie matches for "b -H3PO4"      |            |
| Ion serie matches for "y"             | 1, 2, 3, 4 |
| Ion serie matches for "y -H2O"        | 5          |
| Ion serie matches for "y -H2O -H3PO4" | 6, 8       |
| Ion serie matches for "y -H2O -NH3"   |            |
| Ion serie matches for "y -H3PO4"      | 6, 8, 9    |
| Ion serie matches for "y -NH3"        |            |
| Ion serie matches for "y -NH3 -H3PO4" |            |

Figure S1.

<sup>263</sup>VAQASS[79.96633]SQYFR<sup>273</sup>

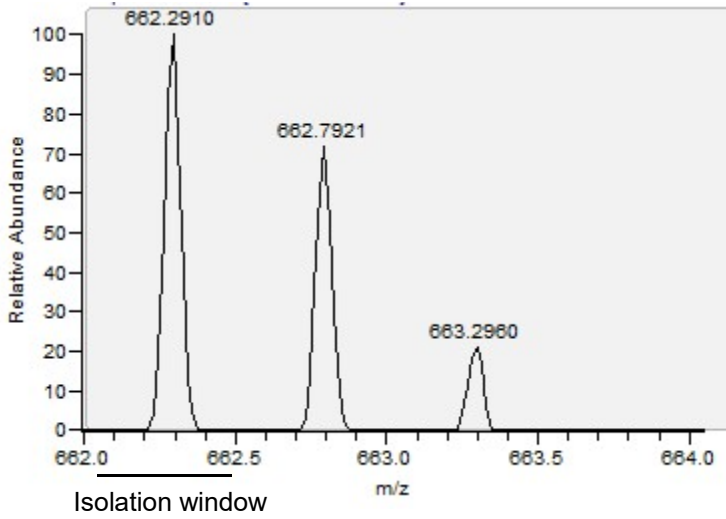

Ser 268/269

Precursor m/z: 662.2910

Precursor mass error: -1.36 ppm

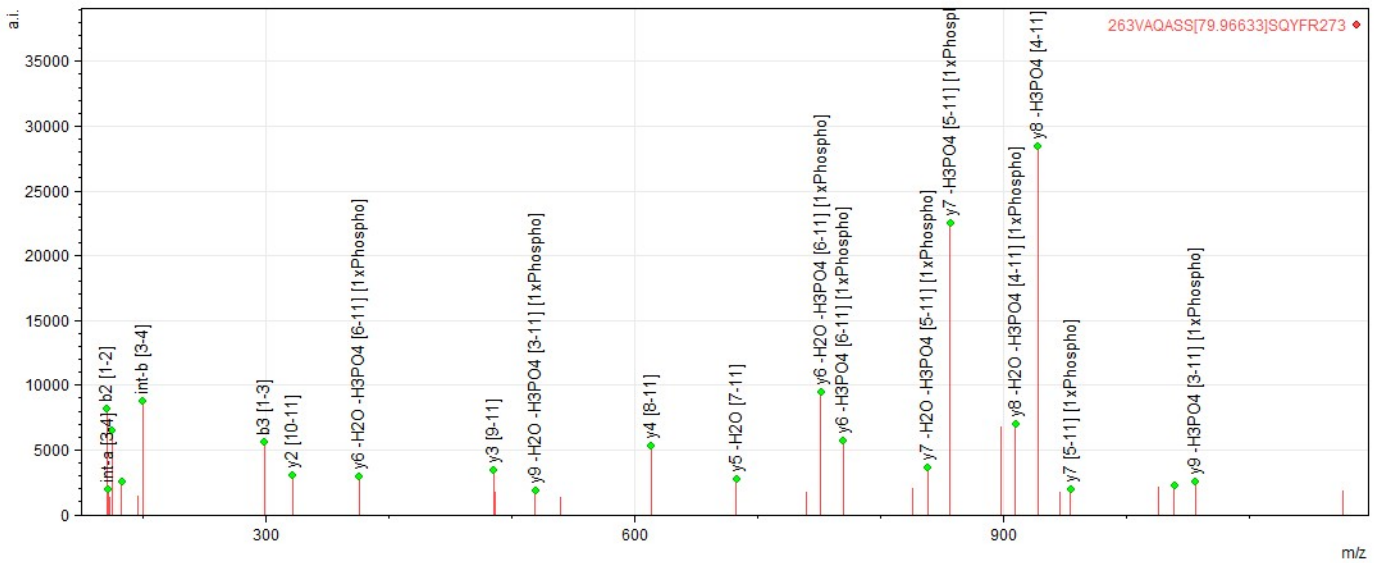

| parameter                             | value         |
|---------------------------------------|---------------|
| Number of peaks searched              | 31            |
| Number of fragments searched          | 976           |
| Number of fragments matched           | 27            |
| Intensity matched                     | 86 %          |
| Sequence length                       | 11            |
| Ion serie matches for "b"             | 2, 3          |
| Ion serie matches for "b -H2O"        |               |
| Ion serie matches for "b -H2O -H3PO4" |               |
| Ion serie matches for "b -H2O -NH3"   |               |
| Ion serie matches for "b -H3PO4"      |               |
| Ion serie matches for "b -NH3"        |               |
| Ion serie matches for "b -NH3 -H3PO4" |               |
| Ion serie matches for "y"             | 1, 2, 3, 4, 7 |
| Ion serie matches for "y -H2O"        | 5             |
| Ion serie matches for "y -H2O -H3PO4" | 6, 6, 7, 8, 9 |
| Ion serie matches for "y -H2O -NH3"   |               |
| Ion serie matches for "y -H3PO4"      | 6, 7, 8, 9    |
| Ion serie matches for "y -NH3"        |               |
| Ion serie matches for "y -NH3 -H3PO4" | 9             |

Figure S1.



# 353FHY[79.96633]AFALNR<sup>361</sup>

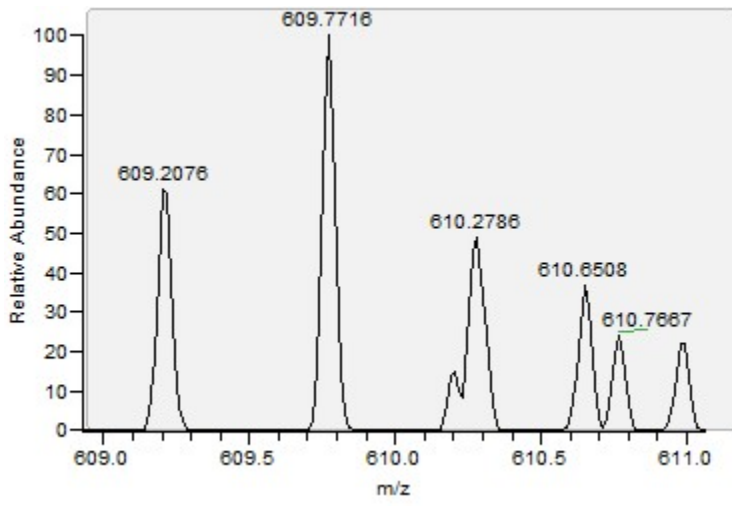

**Tyr 355**

Precursor m/z: 609.7716

Precursor mass error: 7.87 ppm

Isolation window

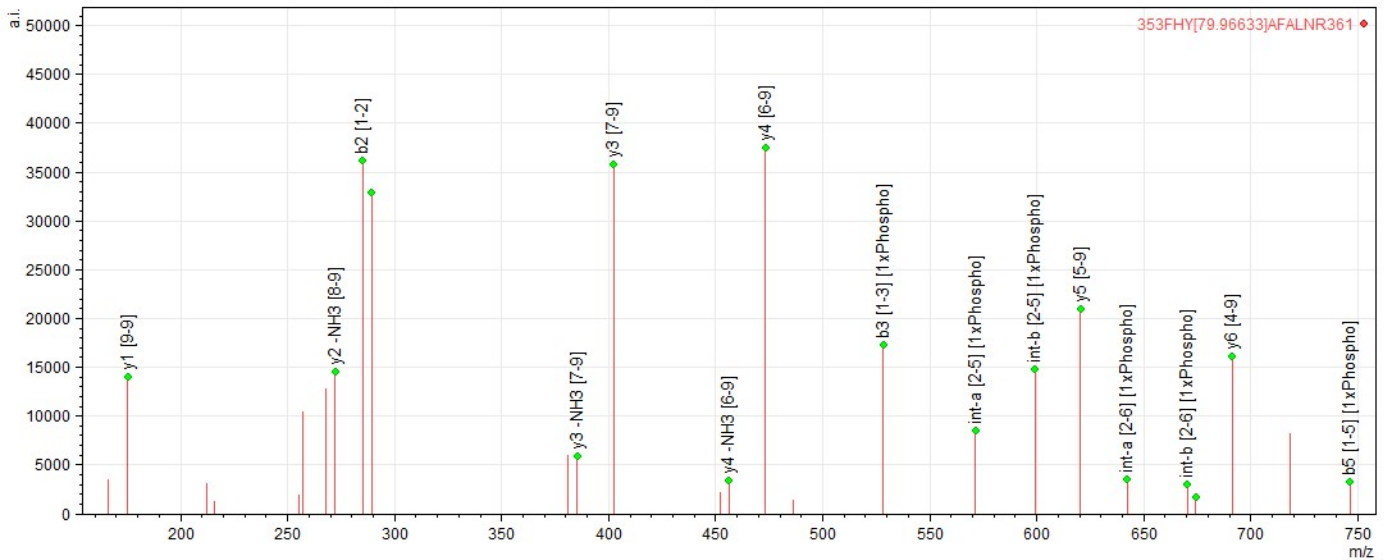

| parameter                      | value            |
|--------------------------------|------------------|
| Number of peaks searched       | 27               |
| Number of fragments searched   | 182              |
| Number of fragments matched    | 18               |
| Intensity matched              | 84 %             |
| Sequence length                | 9                |
| Ion serie matches for "b"      | 2, 3, 4, 5       |
| Ion serie matches for "b -NH3" |                  |
| Ion serie matches for "y"      | 1, 2, 3, 4, 5, 6 |
| Ion serie matches for "y -NH3" | 2, 3, 4, 6       |

Figure S1.

944KKKT[79.96633]QPKLSALSAGSNEYLR<sup>963</sup>

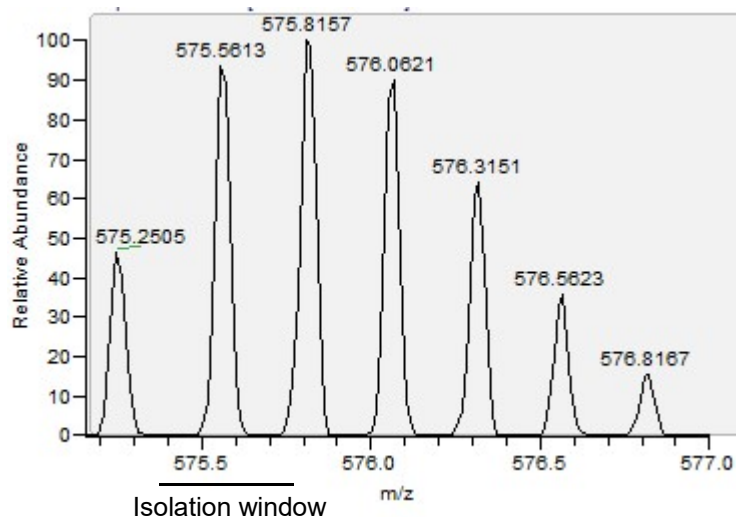

Thr 947/S952

Precursor m/z: 575.5613

Precursor mass error: -0.52 ppm

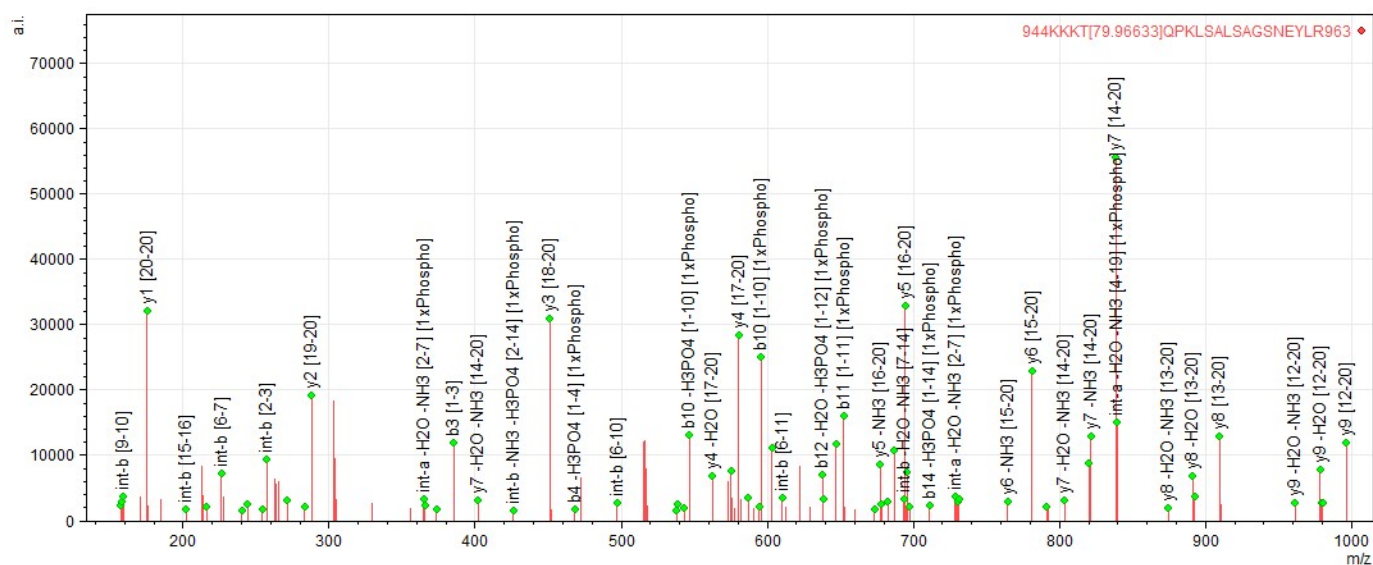

| parameter                             | value                     |
|---------------------------------------|---------------------------|
| Number of peaks searched              | 108                       |
| Number of fragments searched          | 6332                      |
| Number of fragments matched           | 100                       |
| Intensity matched                     | 76 %                      |
| Sequence length                       | 20                        |
| Ion serie matches for "b"             | 2, 3, 5, 10, 11, 12, 13   |
| Ion serie matches for "b -H2O"        | 10, 12                    |
| Ion serie matches for "b -H2O -H3PO4" | 10, 11, 12, 13, 15        |
| Ion serie matches for "b -H2O -NH3"   | 12, 16                    |
| Ion serie matches for "b -H3PO4"      | 4, 10, 11, 12, 13, 14     |
| Ion serie matches for "b -NH3"        | 2                         |
| Ion serie matches for "b -NH3 -H3PO4" | 4, 10, 12                 |
| Ion serie matches for "y"             | 1, 2, 3, 4, 5, 6, 7, 8, 9 |
| Ion serie matches for "y -H2O"        | 4, 7, 8, 9                |
| Ion serie matches for "y -H2O -H3PO4" |                           |
| Ion serie matches for "y -H2O -NH3"   | 6, 7, 7, 8, 9             |
| Ion serie matches for "y -H3PO4"      |                           |
| Ion serie matches for "y -NH3"        | 1, 2, 5, 6, 7, 8, 9       |
| Ion serie matches for "y -NH3 -H3PO4" |                           |

Figure S1.

<sup>945</sup>KKTQPKLS[79.96633]ALSAGSNEYLR<sup>963</sup>

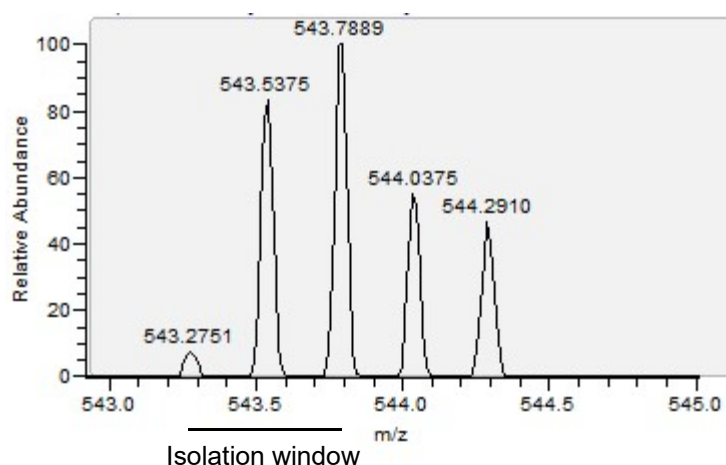

Thr 947/S952

Precursor m/z: 543.5375

Precursor mass error: -2.85 ppm

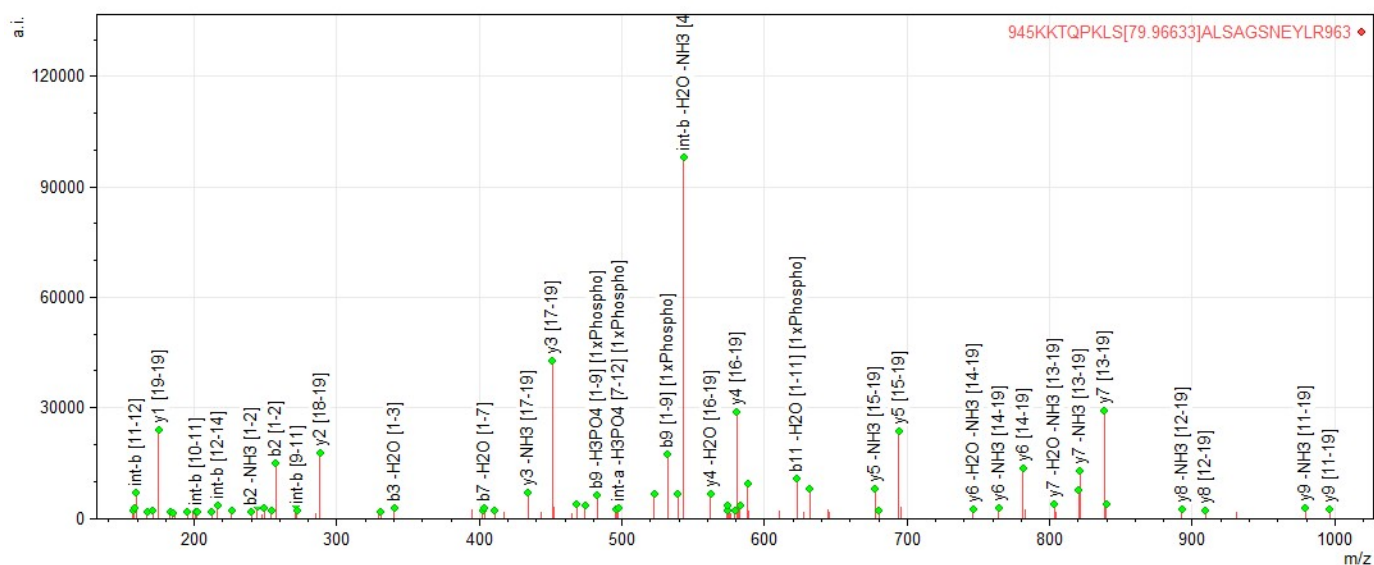

| parameter                              | value                     |
|----------------------------------------|---------------------------|
| Number of peaks searched               | 93                        |
| Number of fragments searched           | 6352                      |
| Number of fragments matched            | 93                        |
| Intensity matched                      | 89 %                      |
| Sequence length                        | 19                        |
| Ion series matches for "b"             | 2, 8, 9, 10, 11           |
| Ion series matches for "b -H2O"        | 3, 4, 7, 9, 10, 11        |
| Ion series matches for "b -H2O -H3PO4" | 11                        |
| Ion series matches for "b -H2O -NH3"   | 4                         |
| Ion series matches for "b -H3PO4"      | 9, 10, 11                 |
| Ion series matches for "b -NH3"        | 2, 3                      |
| Ion series matches for "b -NH3 -H3PO4" | 9, 11                     |
| Ion series matches for "y"             | 1, 2, 3, 4, 5, 6, 7, 8, 9 |
| Ion series matches for "y -H2O"        | 4, 7, 7                   |
| Ion series matches for "y -H2O -H3PO4" |                           |
| Ion series matches for "y -H2O -NH3"   | 6, 7, 7                   |
| Ion series matches for "y -H3PO4"      |                           |
| Ion series matches for "y -NH3"        | 1, 2, 3, 5, 6, 7, 8, 9    |
| Ion series matches for "y -NH3 -H3PO4" |                           |

Figure S1.

<sup>951</sup>LSALS[79.96633]AGSNEYLR<sup>963</sup>

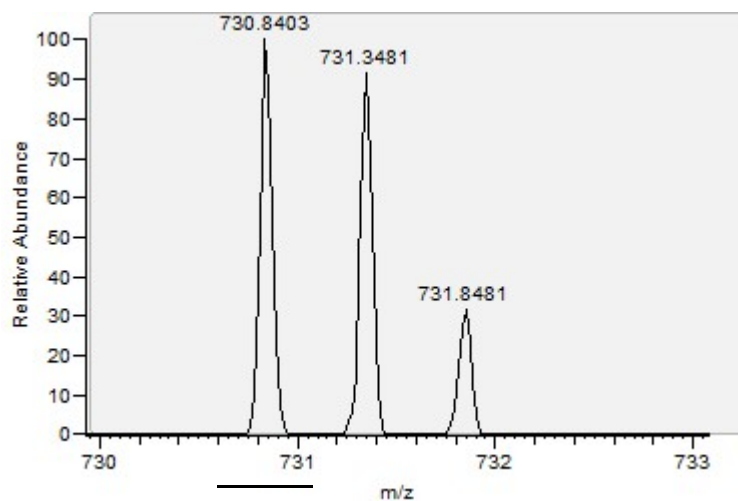

Ser 955

Precursor m/z: 730.8403

Precursor mass error: 3.28 ppm

Isolation window

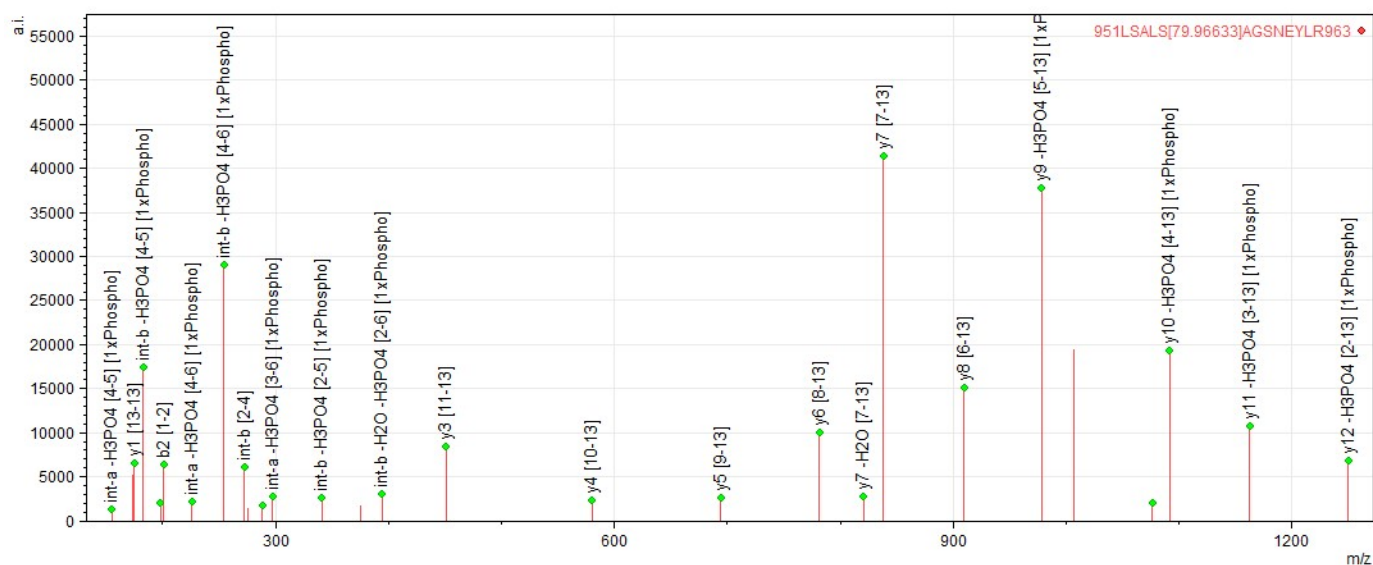

| parameter                             | value                     |
|---------------------------------------|---------------------------|
| Number of peaks searched              | 28                        |
| Number of fragments searched          | 1250                      |
| Number of fragments matched           | 35                        |
| Intensity matched                     | 90 %                      |
| Sequence length                       | 13                        |
| Ion serie matches for "b"             | 2, 3                      |
| Ion serie matches for "b -H2O"        | 2, 3                      |
| Ion serie matches for "b -H2O -H3PO4" | 6                         |
| Ion serie matches for "b -H2O -NH3"   |                           |
| Ion serie matches for "b -H3PO4"      |                           |
| Ion serie matches for "b -NH3"        |                           |
| Ion serie matches for "b -NH3 -H3PO4" |                           |
| Ion serie matches for "y"             | 1, 2, 3, 4, 5, 6, 7, 8, 9 |
| Ion serie matches for "y -H2O"        | 7                         |
| Ion serie matches for "y -H2O -H3PO4" |                           |
| Ion serie matches for "y -H2O -NH3"   |                           |
| Ion serie matches for "y -H3PO4"      | 9, 10, 11, 12             |
| Ion serie matches for "y -NH3"        |                           |
| Ion serie matches for "y -NH3 -H3PO4" |                           |

Figure S1.



<sup>951</sup>LSALSAGS[79.96633]NEYLR<sup>963</sup>

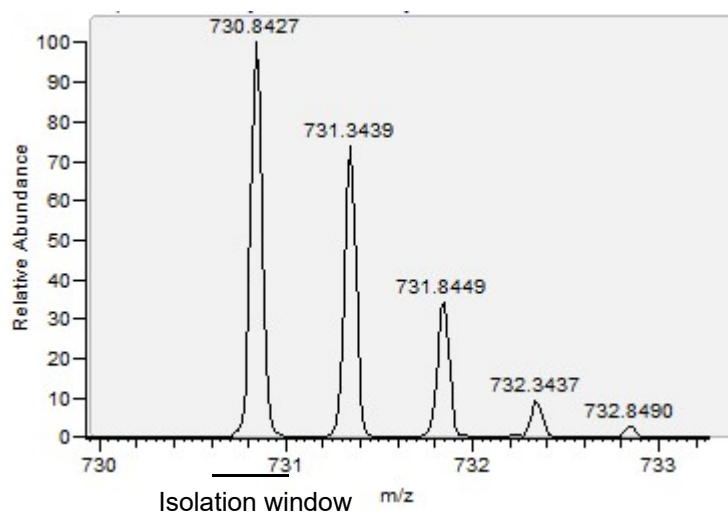

**Ser 958**

Precursor m/z: 730.8427

Precursor mass error: 0 ppm

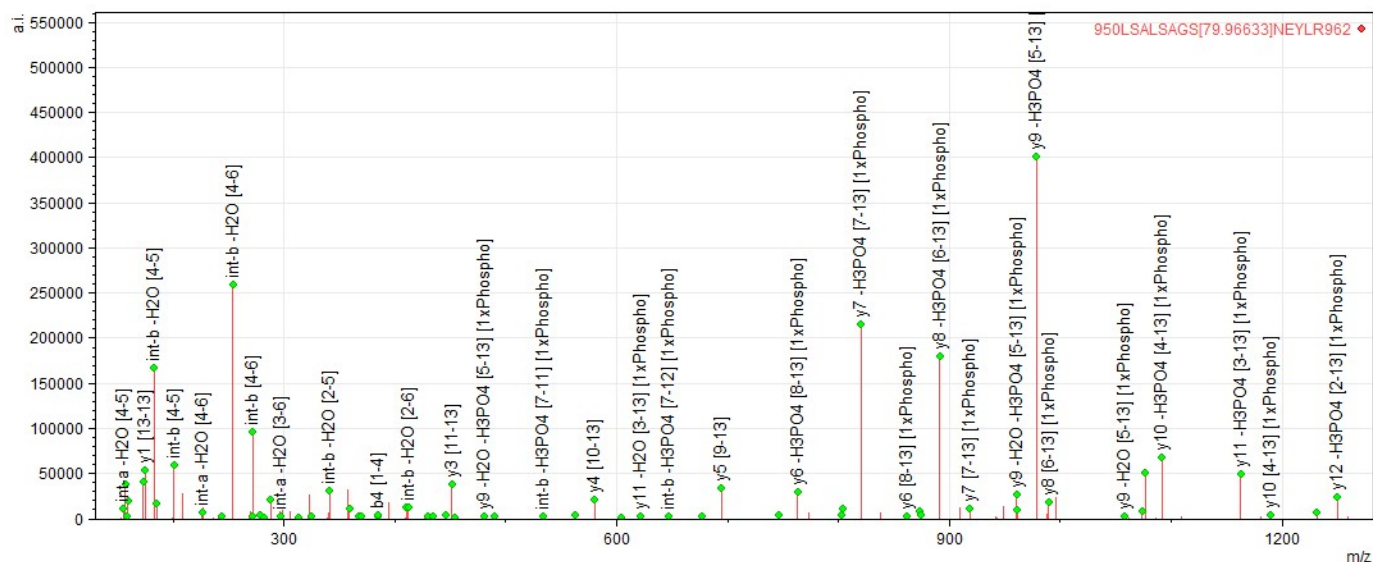

| parameter                             | value                           |
|---------------------------------------|---------------------------------|
| Number of peaks searched              | 104                             |
| Number of fragments searched          | 1328                            |
| Number of fragments matched           | 82                              |
| Intensity matched                     | 88 %                            |
| Sequence length                       | 13                              |
| Ion serie matches for "b"             | 2, 3, 4, 6                      |
| Ion serie matches for "b -H2O"        | 2, 3, 4, 5                      |
| Ion serie matches for "b -H2O -H3PO4" |                                 |
| Ion serie matches for "b -H2O -NH3"   |                                 |
| Ion serie matches for "b -H3PO4"      |                                 |
| Ion serie matches for "b -NH3 -H3PO4" |                                 |
| Ion serie matches for "y"             | 1, 2, 3, 4, 5, 6, 7, 8, 9, 10   |
| Ion serie matches for "y -H2O"        | 4, 9, 11                        |
| Ion serie matches for "y -H2O -H3PO4" | 7, 8, 9, 9, 10, 12              |
| Ion serie matches for "y -H2O -NH3"   |                                 |
| Ion serie matches for "y -H3PO4"      | 6, 7, 7, 8, 8, 9, 9, 10, 11, 12 |
| Ion serie matches for "y -NH3"        | 1, 2, 3, 4, 5                   |
| Ion serie matches for "y -NH3 -H3PO4" | 6, 7, 8, 9                      |

Figure S1.

<sup>947</sup>TQPKLSALSAGS[79.96633]NEYLR<sup>963</sup>

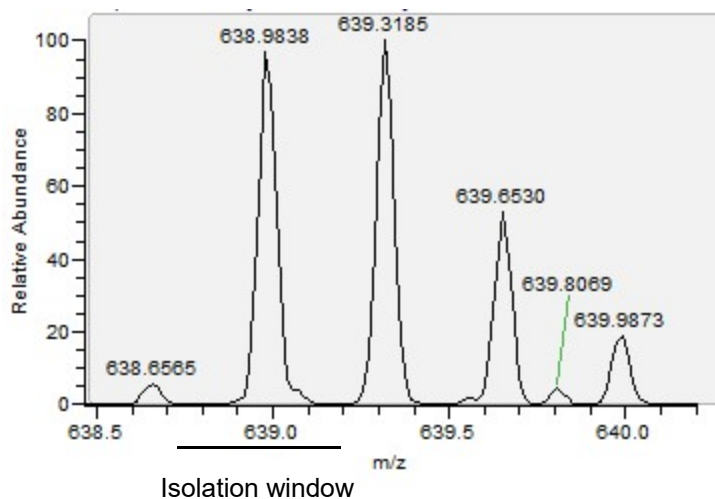

Ser 955/958

Precursor m/z: 638.9838

Precursor mass error: -2.50 ppm

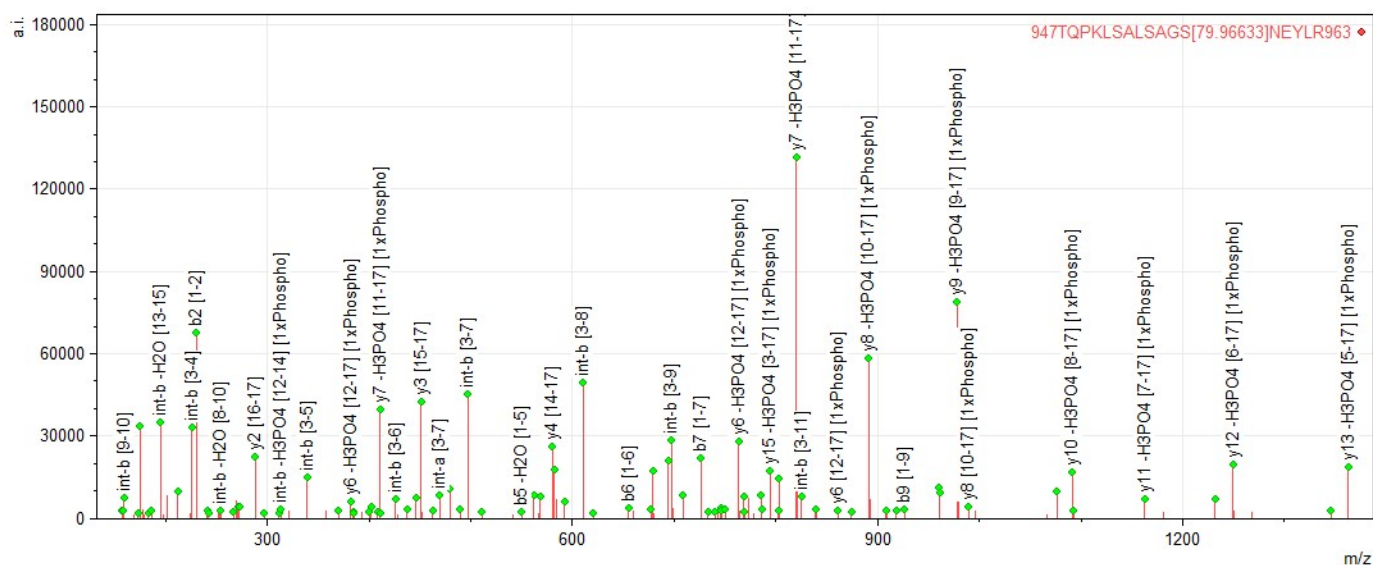

| parameter                              | value                                          |
|----------------------------------------|------------------------------------------------|
| Number of peaks searched               | 127                                            |
| Number of fragments searched           | 3588                                           |
| Number of fragments matched            | 122                                            |
| Intensity matched                      | 89 %                                           |
| Sequence length                        | 17                                             |
| Ion series matches for "b"             | 2, 5, 6, 7, 8, 9                               |
| Ion series matches for "b -H2O"        | 2, 5, 7, 9                                     |
| Ion series matches for "b -H2O -H3PO4" |                                                |
| Ion series matches for "b -H2O -NH3"   | 2, 6                                           |
| Ion series matches for "b -H3PO4"      |                                                |
| Ion series matches for "b -NH3"        | 12                                             |
| Ion series matches for "b -NH3 -H3PO4" |                                                |
| Ion series matches for "y"             | 1, 2, 3, 4, 5, 6, 7, 8, 9                      |
| Ion series matches for "y -H2O"        | 4                                              |
| Ion series matches for "y -H2O -H3PO4" | 7, 9, 11, 12, 12, 15                           |
| Ion series matches for "y -H2O -NH3"   |                                                |
| Ion series matches for "y -H3PO4"      | 6, 6, 7, 7, 8, 8, 9, 9, 10, 11, 12, 13, 14, 15 |
| Ion series matches for "y -NH3"        | 1, 2, 5                                        |
| Ion series matches for "y -NH3 -H3PO4" | 6, 7, 7, 8, 8, 9, 13, 15                       |

Figure S1.



<sup>946</sup>KTQPKLSALSAGS[79.96633]NEYLR<sup>963</sup>

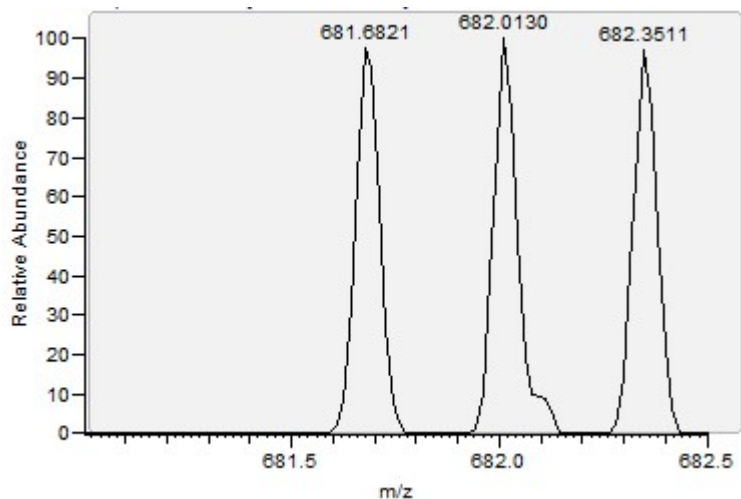

**Ser 955/958**

Precursor m/z: 681.6821

Precursor mass error: -2.30 ppm

Isolation window

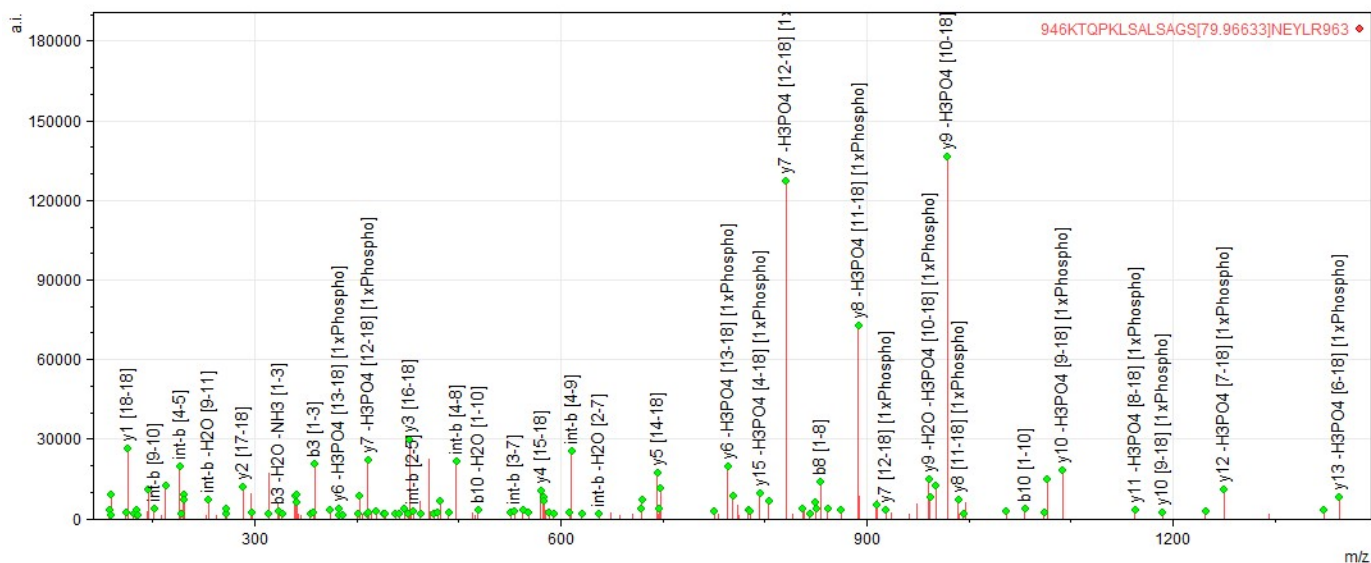

| parameter                             | value                                          |
|---------------------------------------|------------------------------------------------|
| Number of peaks searched              | 150                                            |
| Number of fragments searched          | 4077                                           |
| Number of fragments matched           | 147                                            |
| Intensity matched                     | 83 %                                           |
| Sequence length                       | 18                                             |
| Ion serie matches for "b"             | 2, 3, 4, 5, 6, 7, 8, 8, 9, 10                  |
| Ion serie matches for "b -H2O"        | 2, 3, 6, 8, 8, 9, 10, 10, 11                   |
| Ion serie matches for "b -H2O -H3PO4" |                                                |
| Ion serie matches for "b -H2O -NH3"   | 2, 3, 8                                        |
| Ion serie matches for "b -H3PO4"      |                                                |
| Ion serie matches for "b -NH3"        | 3, 6, 6                                        |
| Ion serie matches for "b -NH3 -H3PO4" |                                                |
| Ion serie matches for "y"             | 1, 2, 3, 4, 5, 6, 7, 8, 9, 10, 12, 15          |
| Ion serie matches for "y -H2O"        | 4                                              |
| Ion serie matches for "y -H2O -H3PO4" | 9, 10, 11, 12, 12, 15, 16                      |
| Ion serie matches for "y -H2O -NH3"   |                                                |
| Ion serie matches for "y -H3PO4"      | 6, 6, 7, 7, 8, 8, 9, 9, 10, 11, 12, 13, 15, 17 |
| Ion serie matches for "y -NH3"        | 1, 2                                           |
| Ion serie matches for "y -NH3 -H3PO4" | 6, 7, 7, 8, 8, 9, 9, 16                        |

Figure S1.

<sup>951</sup>LSALSAGS[79.96633]NEYLR<sup>963</sup>

Ser 955/958

Precursor m/z: 730.8452

Precursor mass error: -3.42 ppm

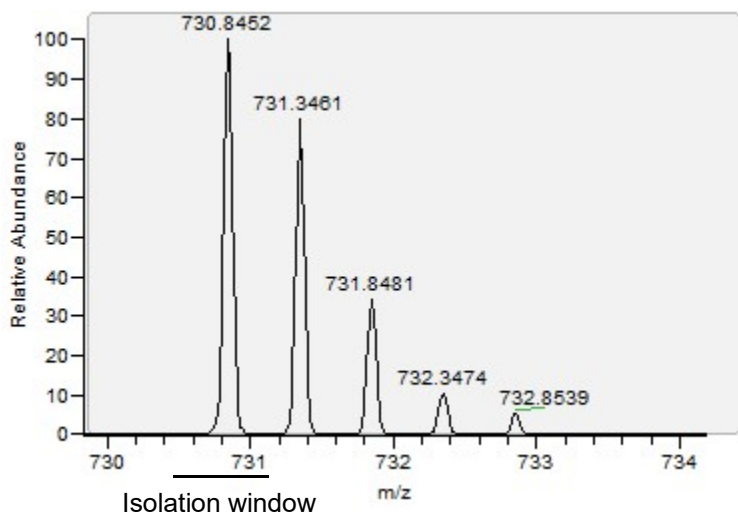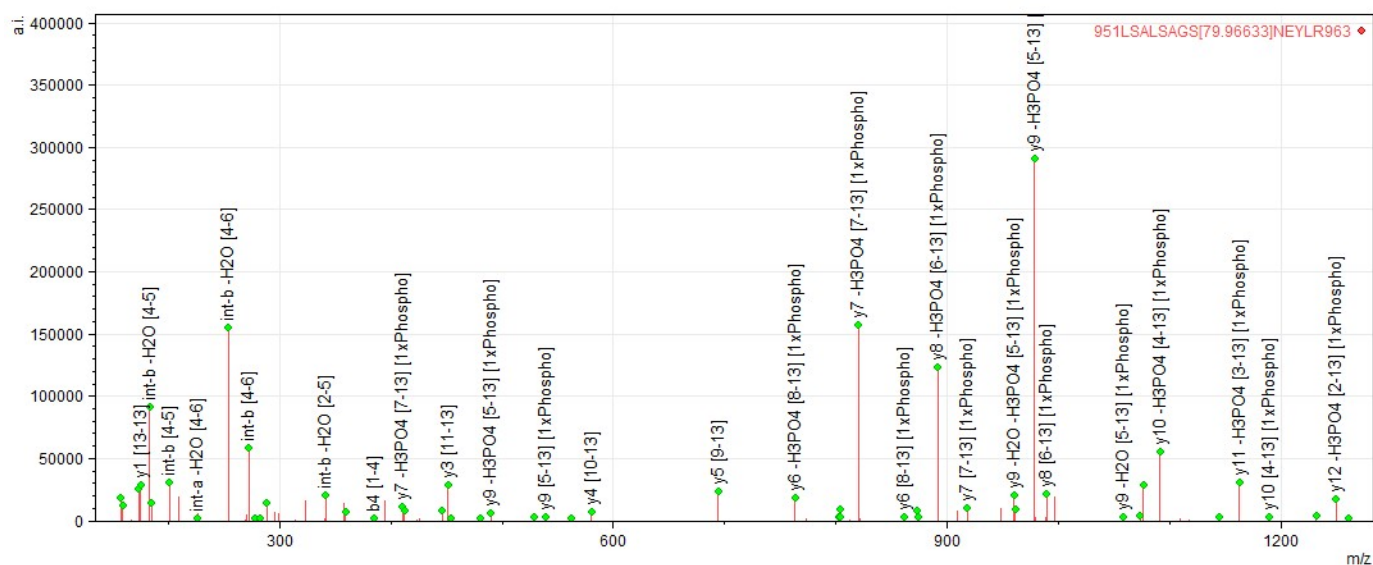

| parameter                             | value                                |
|---------------------------------------|--------------------------------------|
| Number of peaks searched              | 78                                   |
| Number of fragments searched          | 1328                                 |
| Number of fragments matched           | 66                                   |
| Intensity matched                     | 89 %                                 |
| Sequence length                       | 13                                   |
| Ion serie matches for "b"             | 2, 3, 4, 6                           |
| Ion serie matches for "b -H2O"        | 2, 3, 5                              |
| Ion serie matches for "b -H2O -H3PO4" |                                      |
| Ion serie matches for "b -H2O -NH3"   |                                      |
| Ion serie matches for "b -H3PO4"      |                                      |
| Ion serie matches for "b -NH3"        |                                      |
| Ion serie matches for "b -NH3 -H3PO4" |                                      |
| Ion serie matches for "y"             | 1, 2, 3, 4, 5, 6, 7, 8, 9, 9, 10, 11 |
| Ion serie matches for "y -H2O"        | 4, 9                                 |
| Ion serie matches for "y -H2O -H3PO4" | 7, 8, 9, 9, 10, 11, 12               |
| Ion serie matches for "y -H2O -NH3"   |                                      |
| Ion serie matches for "y -H3PO4"      | 6, 7, 7, 8, 8, 9, 9, 10, 11, 12      |
| Ion serie matches for "y -NH3"        | 4                                    |
| Ion serie matches for "y -NH3 -H3PO4" | 7, 8, 9                              |

Figure S1.

1000TRAKS[79.96633]C[57.02146]GERDVK1011

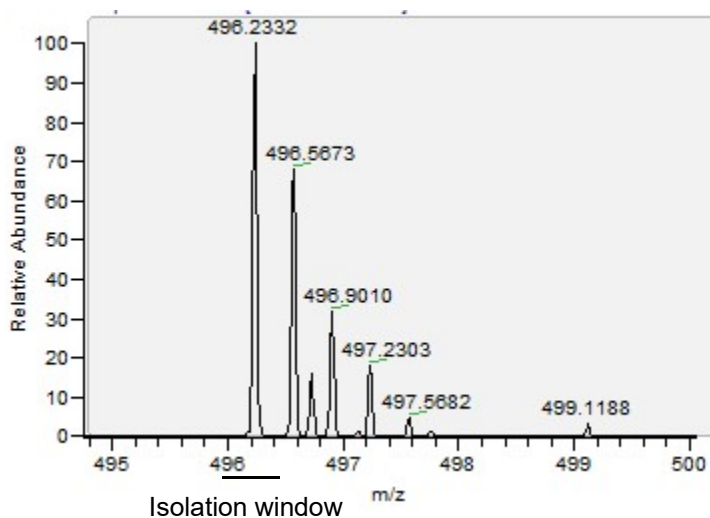

Thr 1000/S1004

Precursor m/z: 496.2332

Precursor mass error: -1.21 ppm

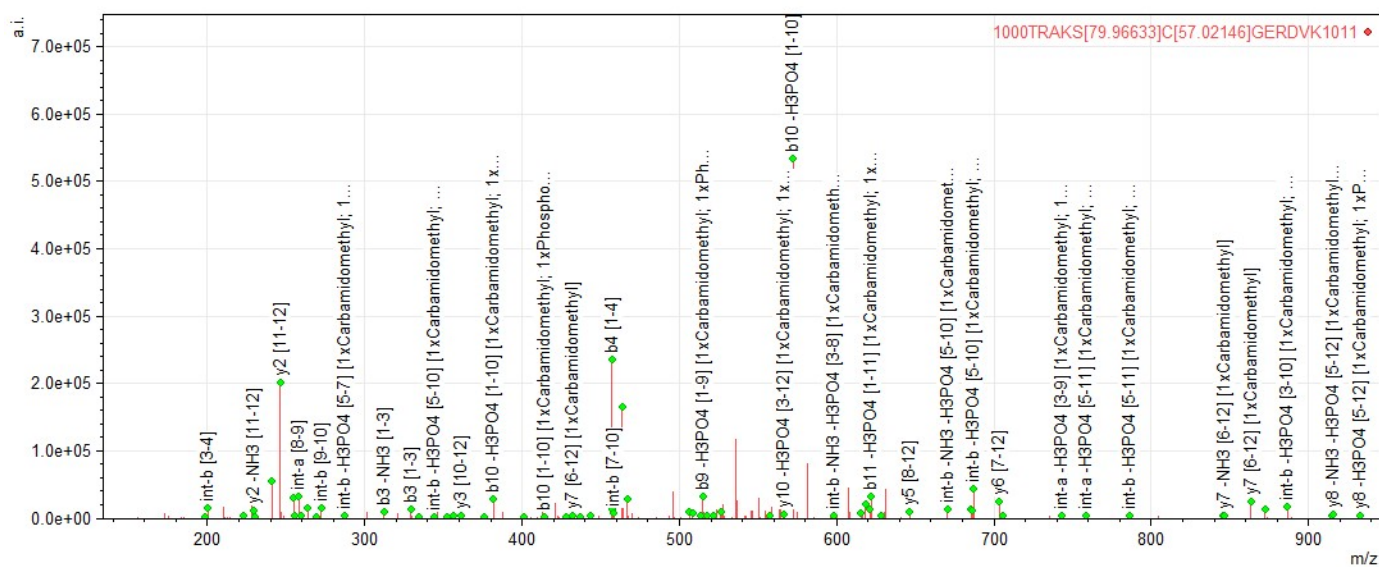

| parameter                             | value                           |
|---------------------------------------|---------------------------------|
| Number of peaks searched              | 170                             |
| Number of fragments searched          | 1845                            |
| Number of fragments matched           | 84                              |
| Intensity matched                     | 62 %                            |
| Sequence length                       | 12                              |
| Ion serie matches for "b"             | 2, 3, 4, 10, 10                 |
| Ion serie matches for "b -H2O"        |                                 |
| Ion serie matches for "b -H2O -H3PO4" | 5, 5, 6, 8, 10                  |
| Ion serie matches for "b -H2O -NH3"   | 2                               |
| Ion serie matches for "b -H3PO4"      | 5, 5, 6, 7, 8, 8, 9, 10, 10, 11 |
| Ion serie matches for "b -NH3"        | 2, 3                            |
| Ion serie matches for "b -NH3 -H3PO4" | 9, 10, 10                       |
| Ion serie matches for "y"             | 2, 3, 4, 4, 5, 6, 6, 7, 7       |
| Ion serie matches for "y -H2O"        | 5, 6, 7                         |
| Ion serie matches for "y -H2O -H3PO4" | 8, 9, 10                        |
| Ion serie matches for "y -H2O -NH3"   | 6                               |
| Ion serie matches for "y -H3PO4"      | 8, 8, 10                        |
| Ion serie matches for "y -NH3"        | 2, 6, 7                         |
| Ion serie matches for "y -NH3 -H3PO4" | 8, 8                            |

Figure S1.



1000TRAKS[79.96633]C[57.02146]GERDVKGIR<sup>1014</sup>

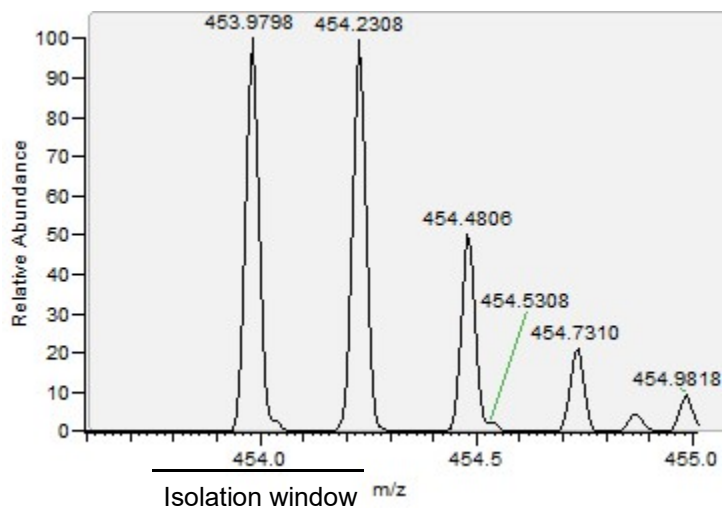

Thr 1000/S1004

Precursor m/z: 453.9788

Precursor mass error: -1.93 ppm

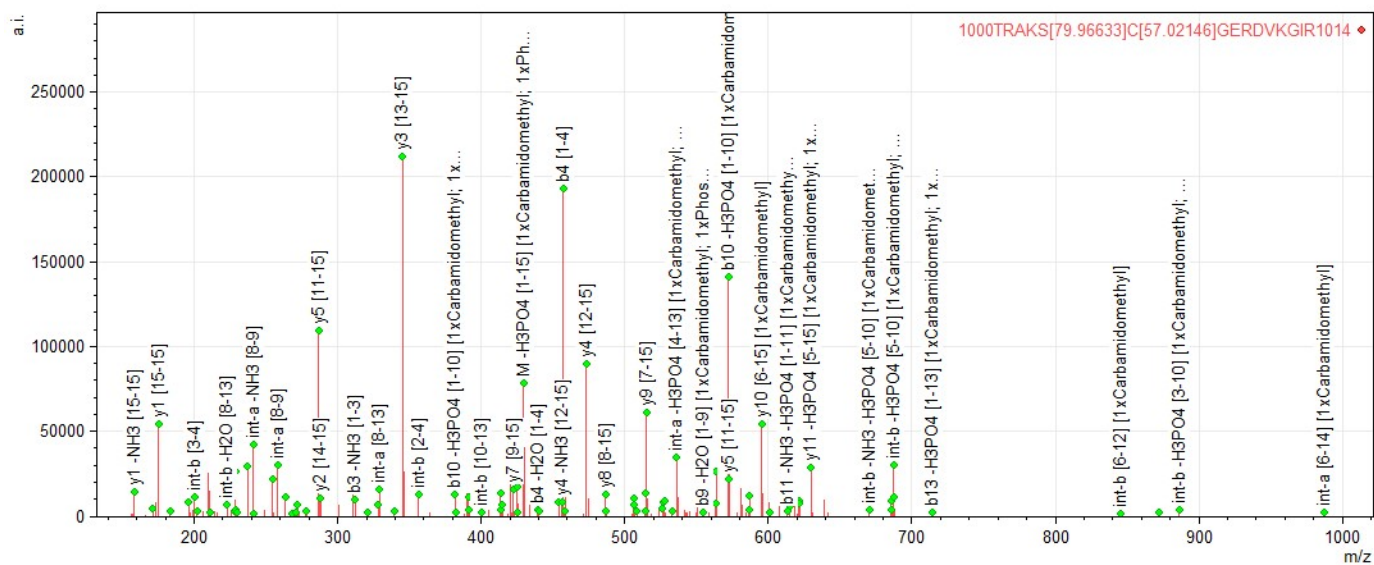

| parameter                             | value                               |
|---------------------------------------|-------------------------------------|
| Number of peaks searched              | 168                                 |
| Number of fragments searched          | 3824                                |
| Number of fragments matched           | 103                                 |
| Intensity matched                     | 77 %                                |
| Sequence length                       | 15                                  |
| Ion serie matches for "b"             | 2, 3, 4, 4, 9, 13                   |
| Ion serie matches for "b -H2O"        | 4, 9                                |
| Ion serie matches for "b -H2O -H3PO4" | 5, 5, 10                            |
| Ion serie matches for "b -H2O -NH3"   | 2                                   |
| Ion serie matches for "b -H3PO4"      | 5, 5, 8, 9, 10, 10, 11, 12, 13, 14  |
| Ion serie matches for "b -NH3"        | 2, 3, 4                             |
| Ion serie matches for "b -NH3 -H3PO4" | 9, 10, 11                           |
| Ion serie matches for "y"             | 1, 2, 3, 4, 4, 5, 5, 6, 7, 8, 9, 10 |
| Ion serie matches for "y -H2O"        | 7, 10, 10                           |
| Ion serie matches for "y -H2O -H3PO4" |                                     |
| Ion serie matches for "y -H2O -NH3"   |                                     |
| Ion serie matches for "y -H3PO4"      | 11, 11, 13                          |
| Ion serie matches for "y -NH3"        | 1, 2, 3, 4, 4, 5, 7, 9, 10, 10      |
| Ion serie matches for "y -NH3 -H3PO4" | 11, 11, 12, 14                      |

Figure S1.

1002AKS[79.96633]C[57.02146]GERDVK1011

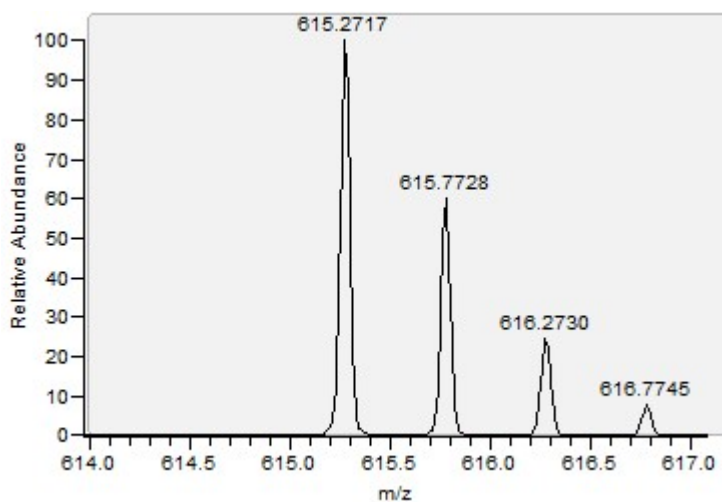

Ser 1004

Precursor m/z: 615.2717

Precursor mass error: -1.38 ppm

Isolation window

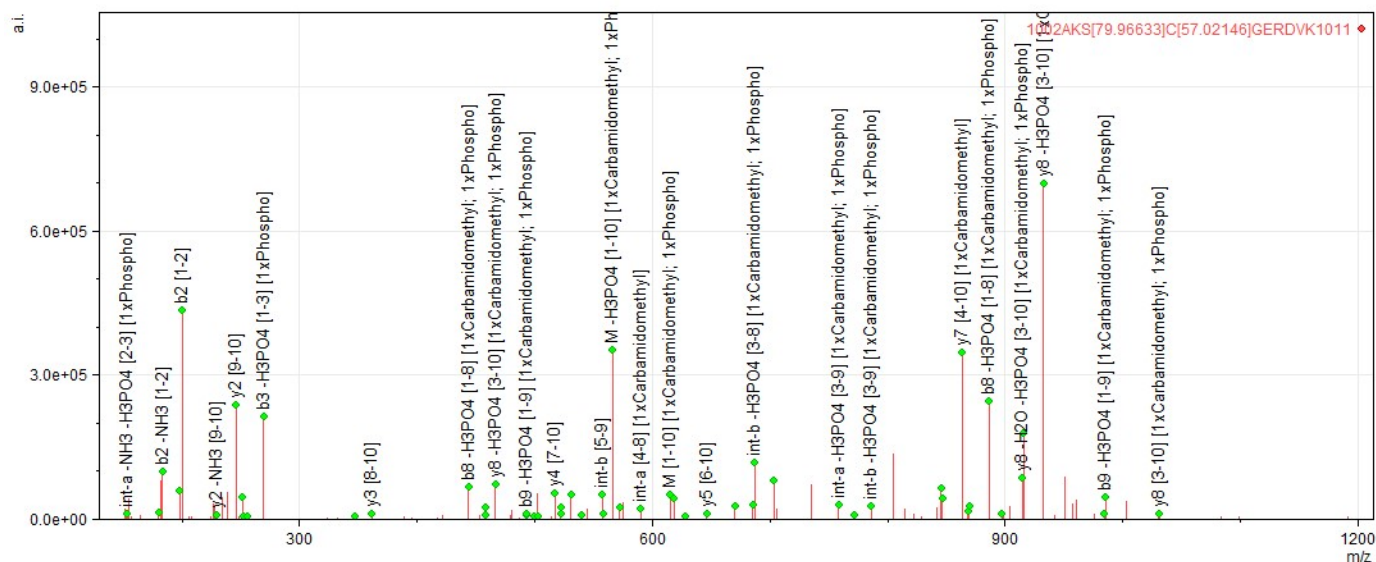

| parameter                             | value               |
|---------------------------------------|---------------------|
| Number of peaks searched              | 106                 |
| Number of fragments searched          | 758                 |
| Number of fragments matched           | 60                  |
| Intensity matched                     | 78 %                |
| Sequence length                       | 10                  |
| Ion serie matches for "b"             | 2, 8, 8             |
| Ion serie matches for "b -H2O"        |                     |
| Ion serie matches for "b -H2O -H3PO4" | 3, 8                |
| Ion serie matches for "b -H2O -NH3"   |                     |
| Ion serie matches for "b -H3PO4"      | 3, 7, 8, 8, 9, 9    |
| Ion serie matches for "b -NH3"        | 2                   |
| Ion serie matches for "b -NH3 -H3PO4" | 3, 8                |
| Ion serie matches for "y"             | 2, 3, 4, 5, 6, 7, 8 |
| Ion serie matches for "y -H2O"        | 4, 5, 6, 7          |
| Ion serie matches for "y -H2O -H3PO4" | 8, 8, 9             |
| Ion serie matches for "y -H2O -NH3"   |                     |
| Ion serie matches for "y -H3PO4"      | 8, 8, 9             |
| Ion serie matches for "y -NH3"        | 2, 7                |
| Ion serie matches for "y -NH3 -H3PO4" | 8, 8, 9             |

Figure S1.

<sup>1057</sup>ILT[79.96633]EDQDKIVR<sup>1067</sup>

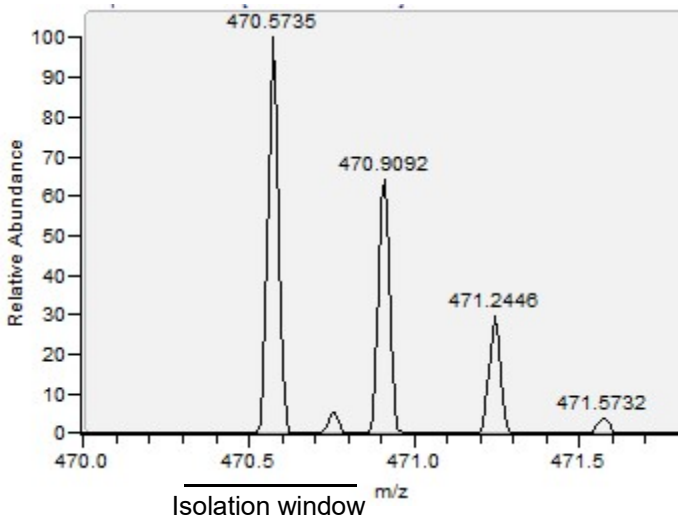

Thr 1059

Precursor m/z: 470.5735

Precursor mass error: -1.70 ppm

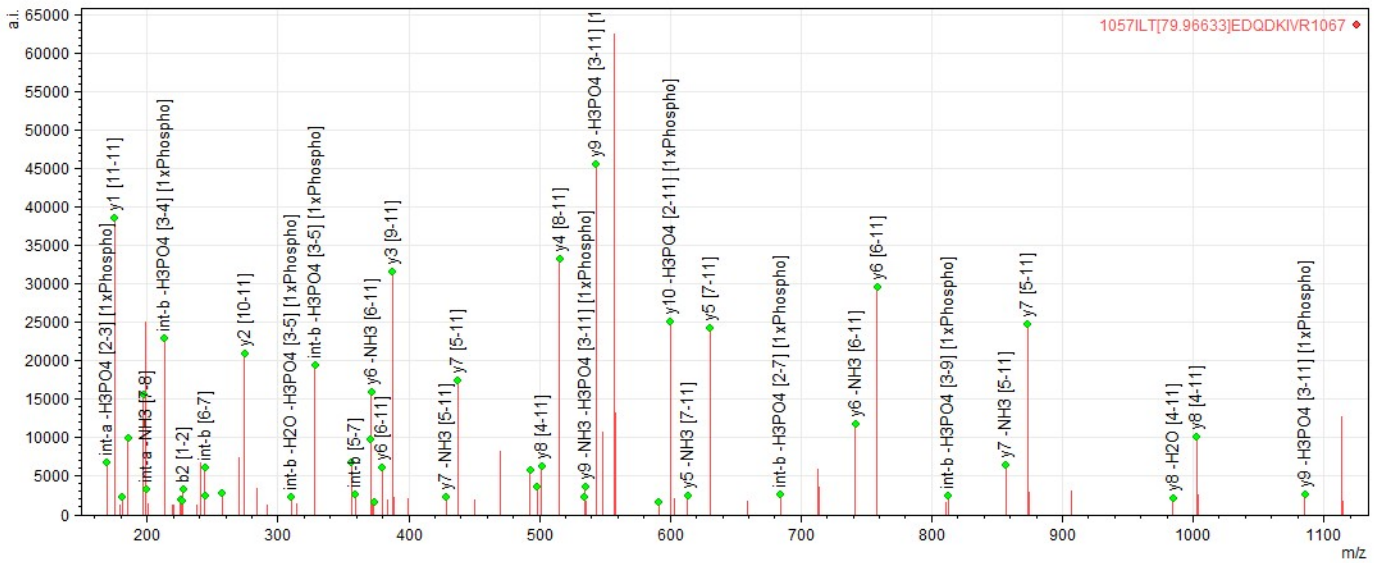

| parameter                             | value                           |
|---------------------------------------|---------------------------------|
| Number of peaks searched              | 81                              |
| Number of fragments searched          | 1326                            |
| Number of fragments matched           | 51                              |
| Intensity matched                     | 69 %                            |
| Sequence length                       | 11                              |
| Ion serie matches for "b"             | 2                               |
| Ion serie matches for "b -H2O"        |                                 |
| Ion serie matches for "b -H2O -H3PO4" |                                 |
| Ion serie matches for "b -H2O -NH3"   |                                 |
| Ion serie matches for "b -H3PO4"      |                                 |
| Ion serie matches for "b -NH3"        |                                 |
| Ion serie matches for "b -NH3 -H3PO4" |                                 |
| Ion serie matches for "y"             | 1, 2, 3, 4, 5, 6, 6, 7, 7, 8, 8 |
| Ion serie matches for "y -H2O"        | 6, 8, 8                         |
| Ion serie matches for "y -H2O -H3PO4" | 9                               |
| Ion serie matches for "y -H2O -NH3"   |                                 |
| Ion serie matches for "y -H3PO4"      | 9, 9, 10                        |
| Ion serie matches for "y -NH3"        | 2, 4, 5, 6, 6, 7, 7             |
| Ion serie matches for "y -NH3 -H3PO4" | 9, 10                           |

Figure S1.



$^{1240}\text{S}[79.96633]\text{LNVQLGR}^{1247}$

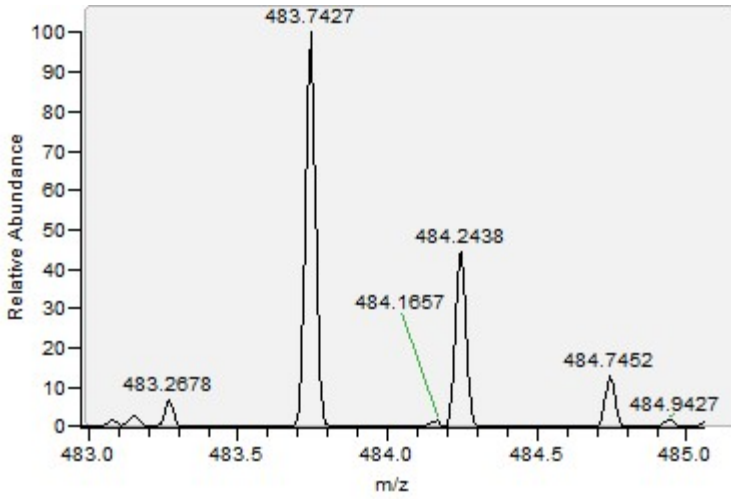

**Ser 1240**

Precursor m/z: 483.7427

Precursor mass error: -1.34 ppm

Isolation window

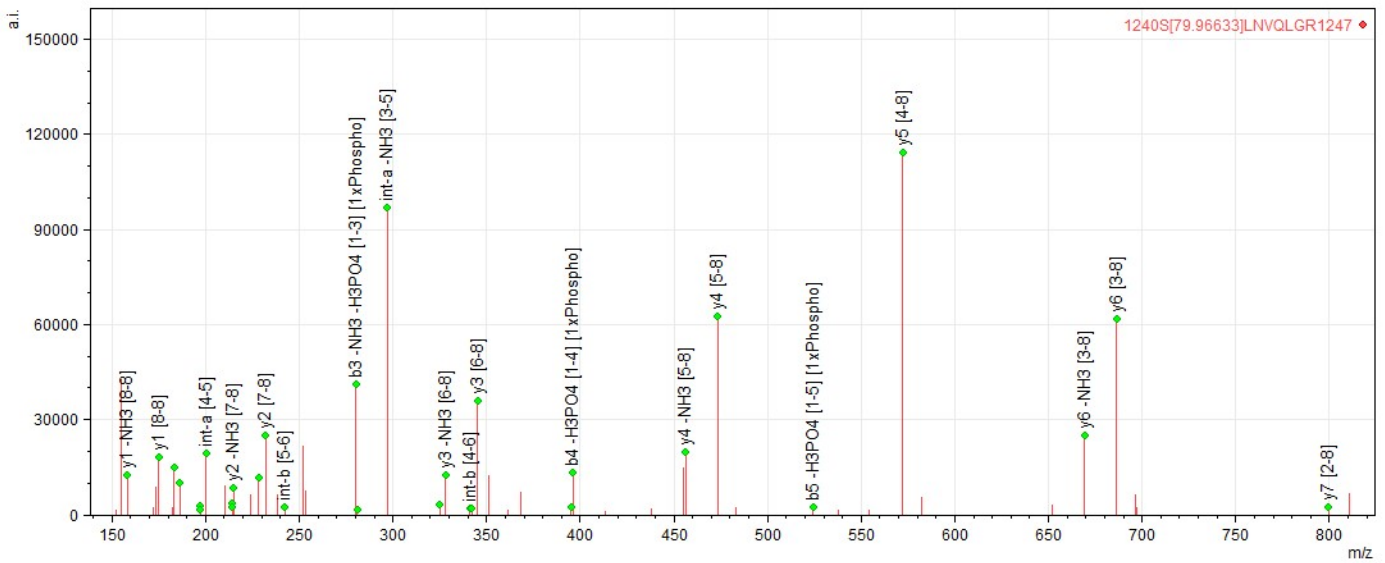

| parameter                             | value               |
|---------------------------------------|---------------------|
| Number of peaks searched              | 55                  |
| Number of fragments searched          | 262                 |
| Number of fragments matched           | 37                  |
| Intensity matched                     | 77 %                |
| Sequence length                       | 8                   |
| Ion serie matches for "b"             | 2, 3                |
| Ion serie matches for "b -H2O"        |                     |
| Ion serie matches for "b -H2O -H3PO4" |                     |
| Ion serie matches for "b -H2O -NH3"   |                     |
| Ion serie matches for "b -H3PO4"      | 2, 3, 4, 5          |
| Ion serie matches for "b -NH3"        |                     |
| Ion serie matches for "b -NH3 -H3PO4" | 3                   |
| Ion serie matches for "y"             | 1, 2, 3, 4, 5, 6, 7 |
| Ion serie matches for "y -NH3"        | 1, 2, 3, 4, 6       |

Figure S1.

Figure S2. Graphs of all detected and quantified ASK1 phosphopeptides in the HNE treated cells. For each concentration point (10 and 50  $\mu\text{M}$ ) the peptide peak area was compared against the peptide peak area for the control sample (0  $\mu\text{M}$ ). Graphs are shown for (A) Ser 83 (B) Thr 947|Ser 952 (C) Ser 955|Ser 958 (D) Thr 1000|Ser 1004 (E) Thr 1059 (F) Ser 1240.

A

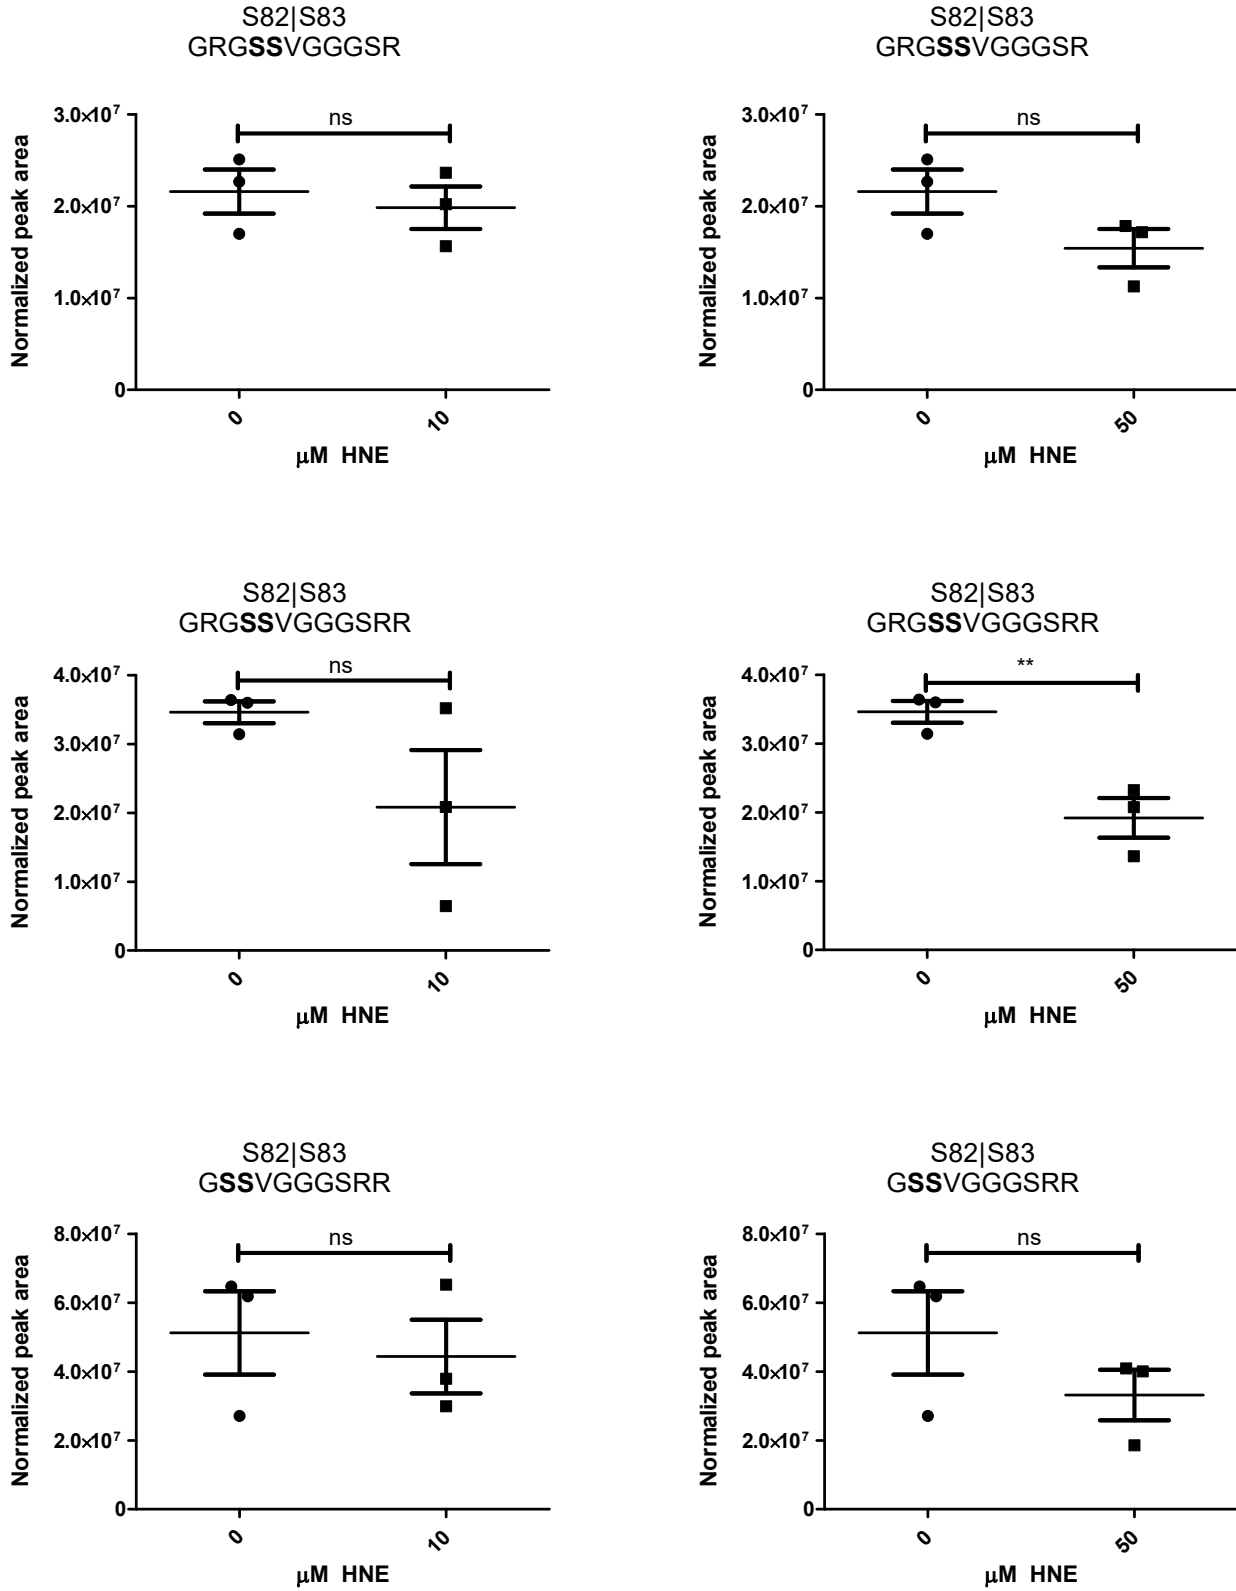

Figure S2.

B

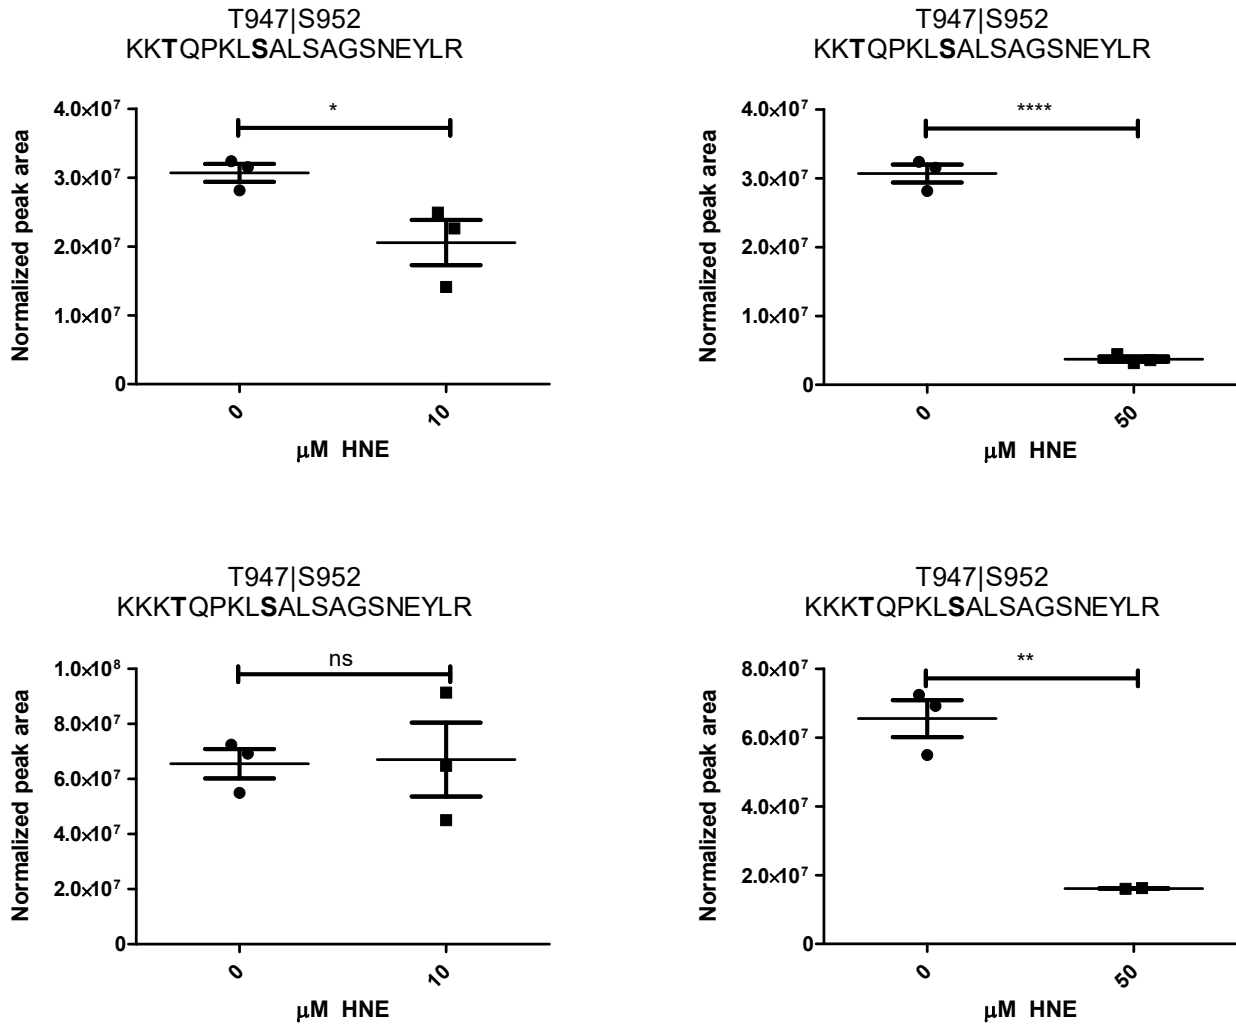

C

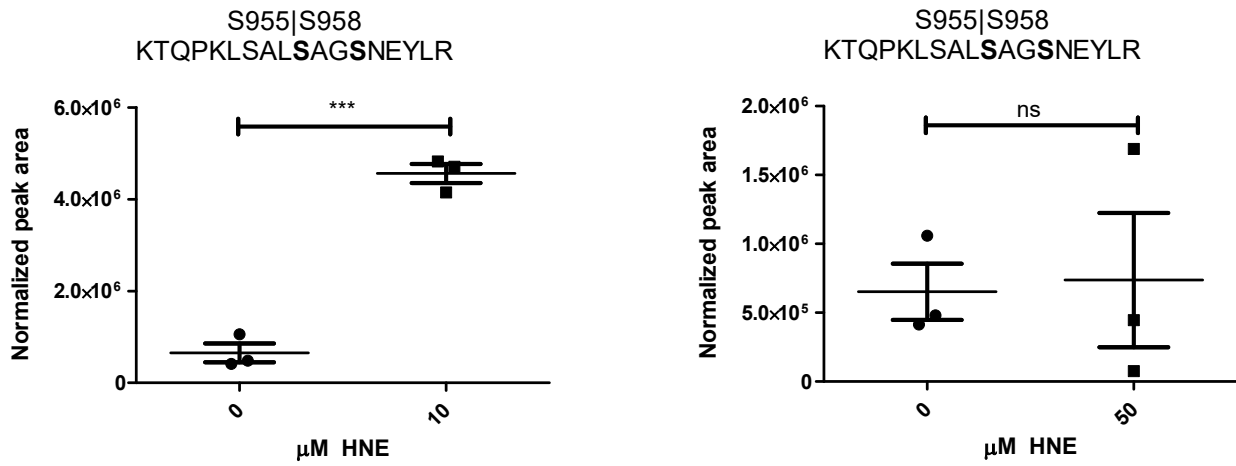

Figure S2.

C

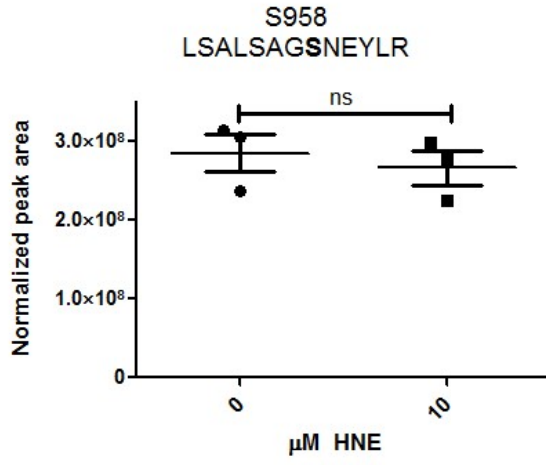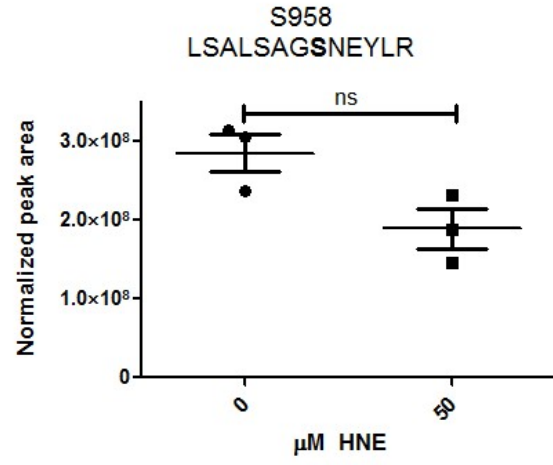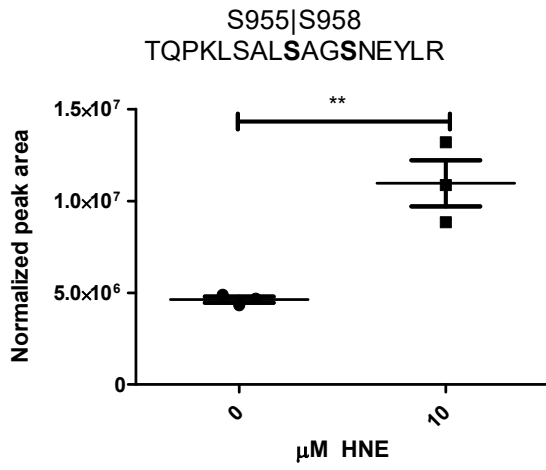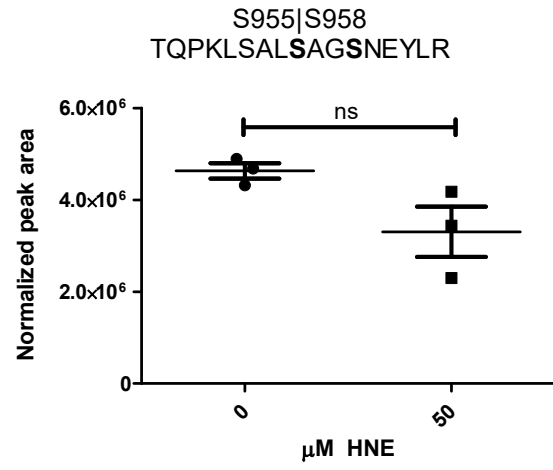

D

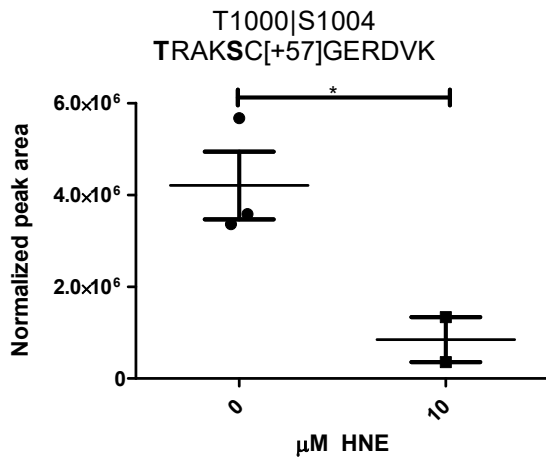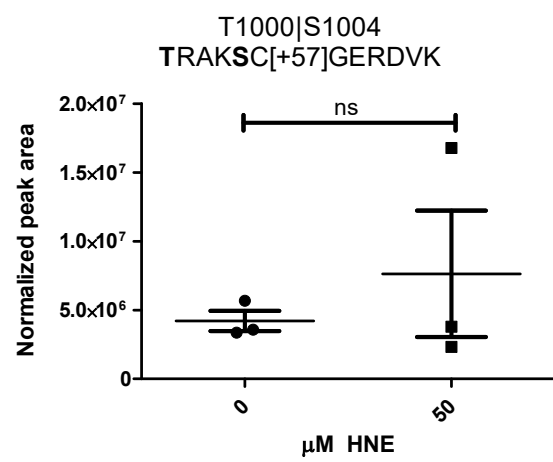

Figure S2.

D

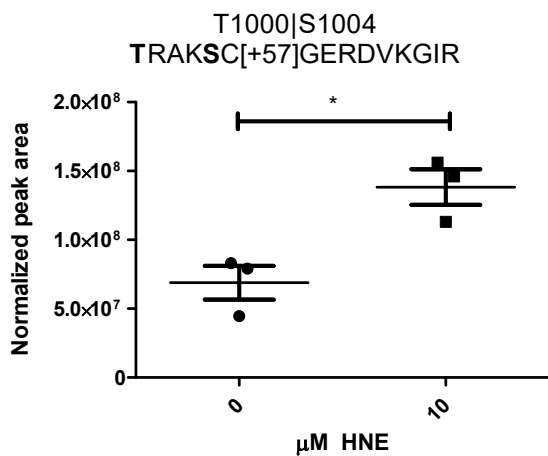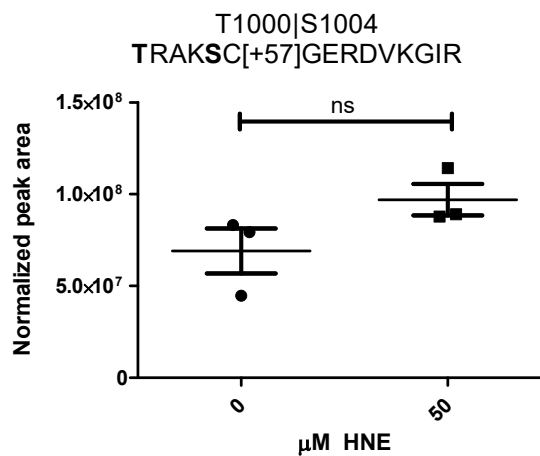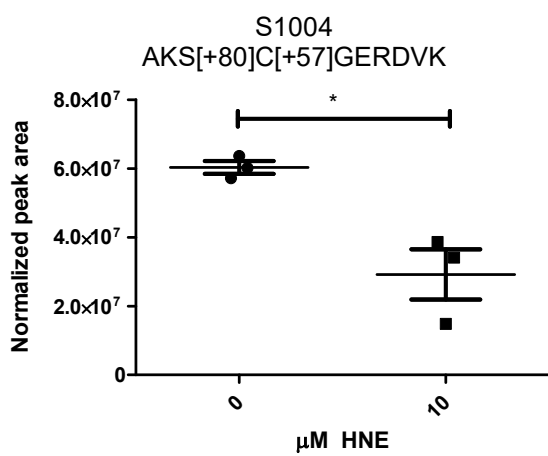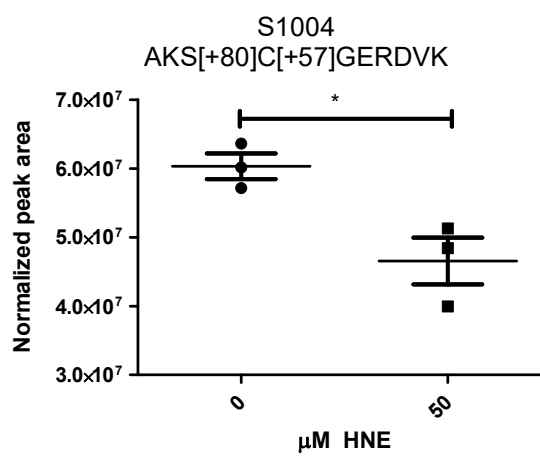

E

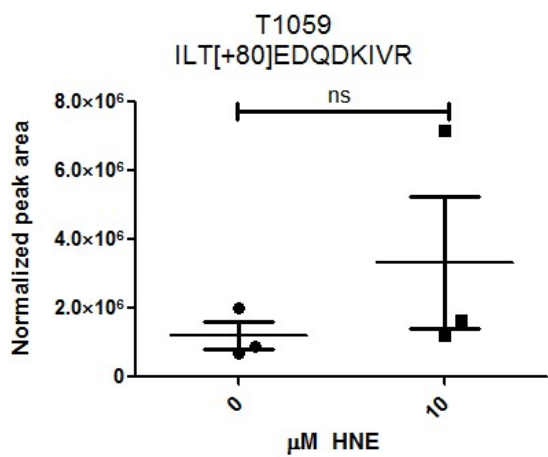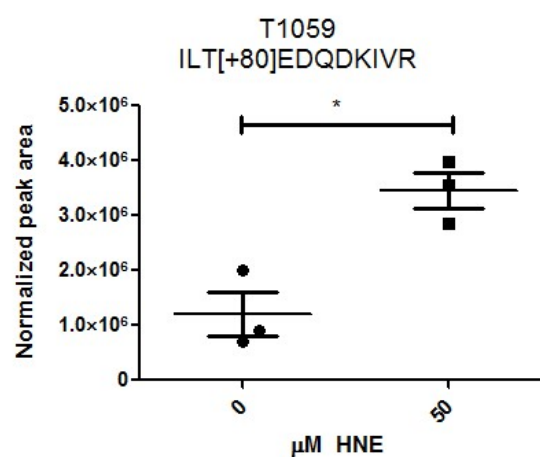

Figure S2.



F

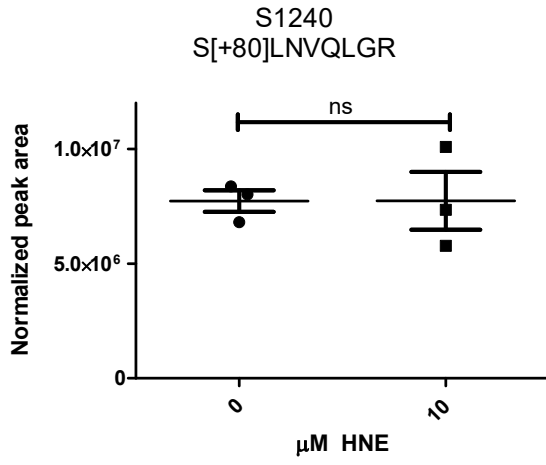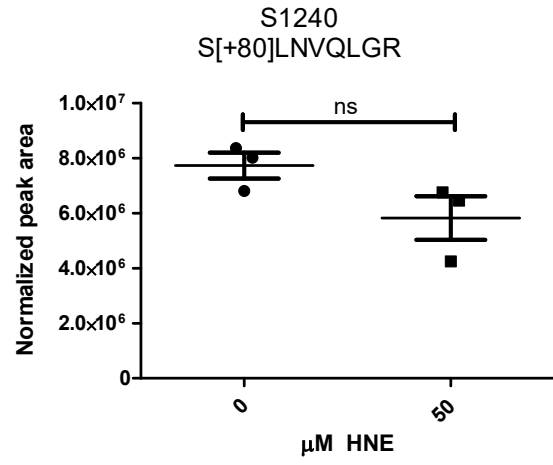

Figure S2.

Figure S3. Graphs of all detected and quantified ASK1 phosphopeptides in the H<sub>2</sub>O<sub>2</sub> treated cells. For each concentration point (500 and 5000 μM) the peptide peak area was compared against the peptide peak area for the control sample (0 μM). Graphs are shown for (A) Ser 83 (B) Thr 140|Thr 141 (C) Ser 268|Ser 269 (D) Tyr 355 (E) Thr 947|Ser 952 (F) Ser 955 (G) Ser 958 (H) Ser 1004 (I) Ser 1240.

A

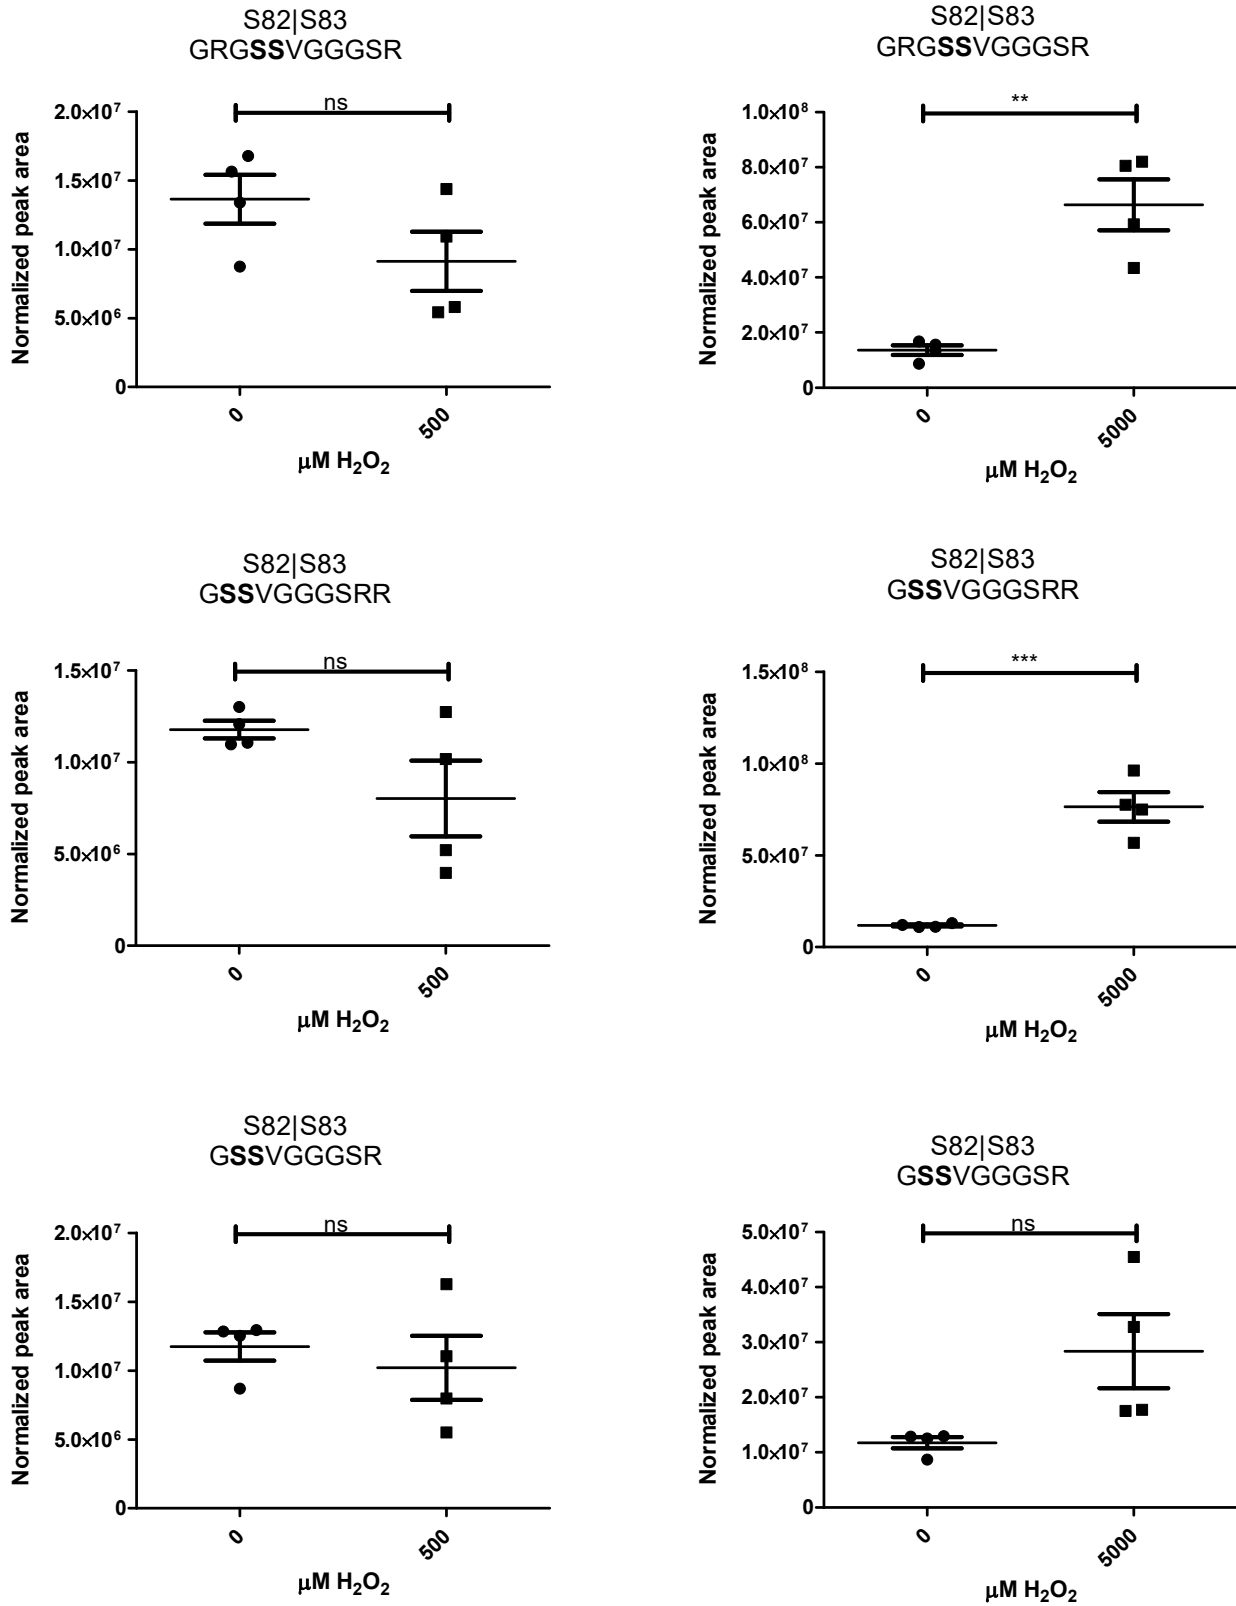

Figure S3.

A

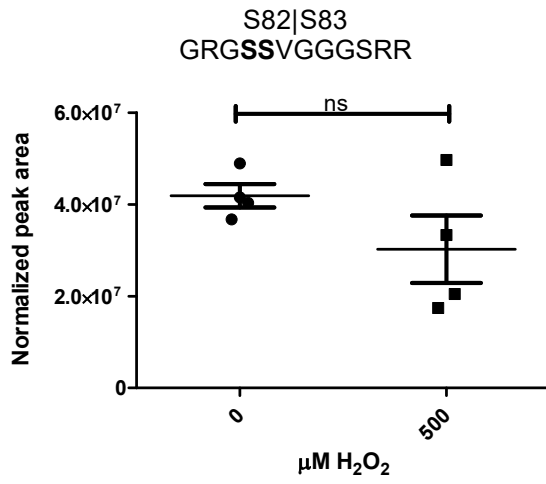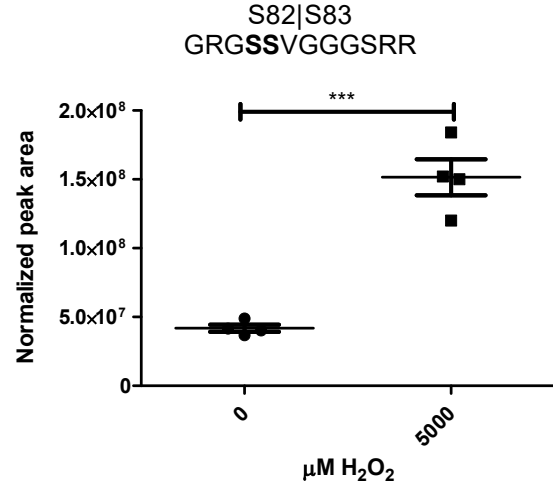

B

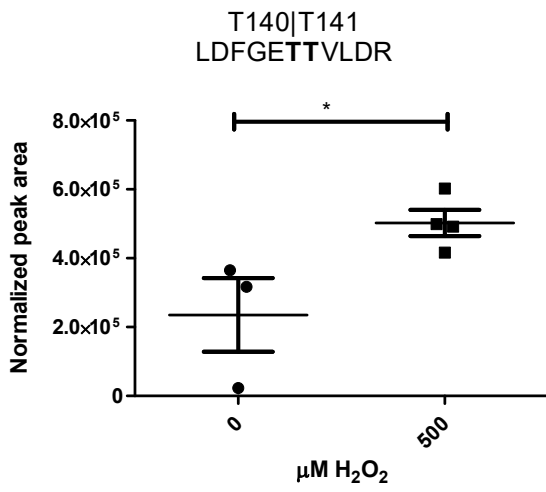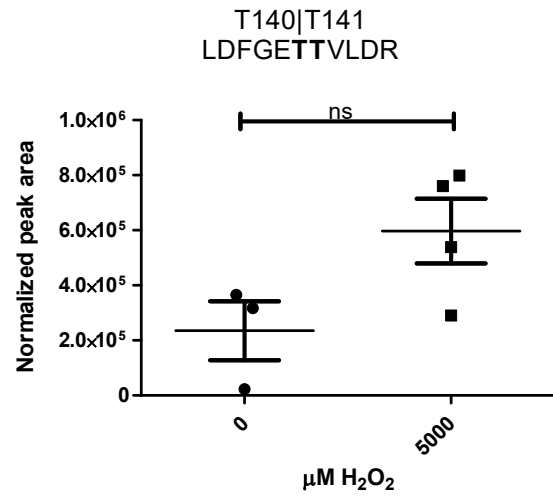

C

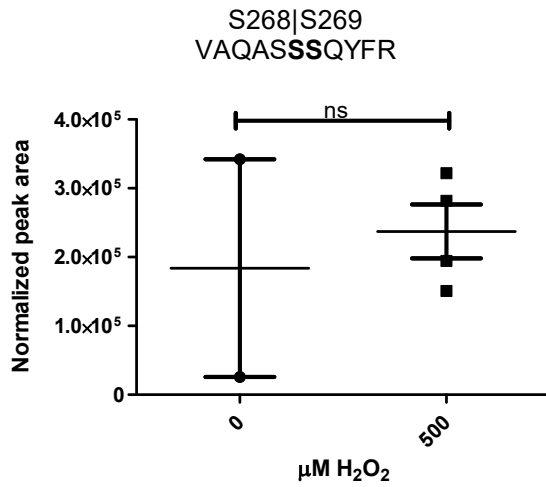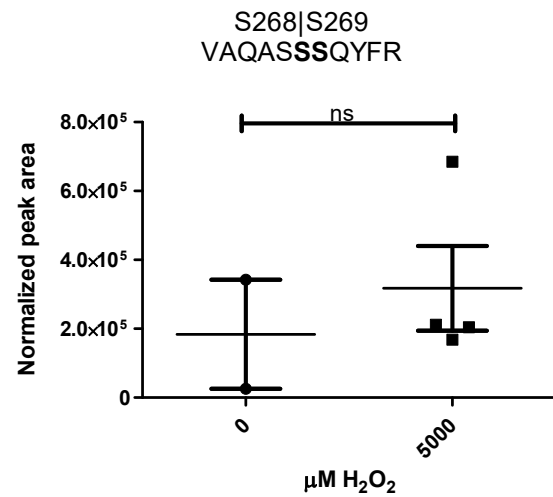

Figure S3.

D

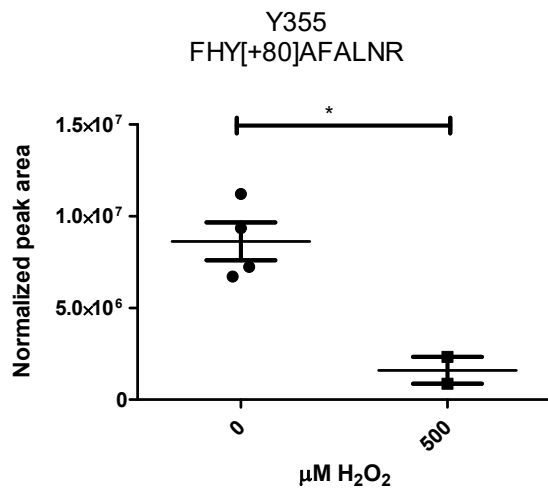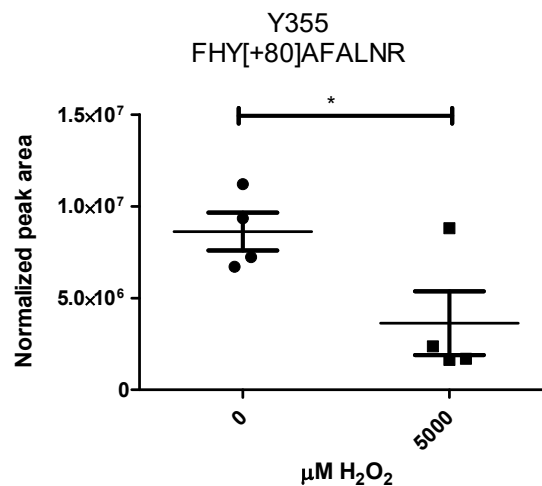

E

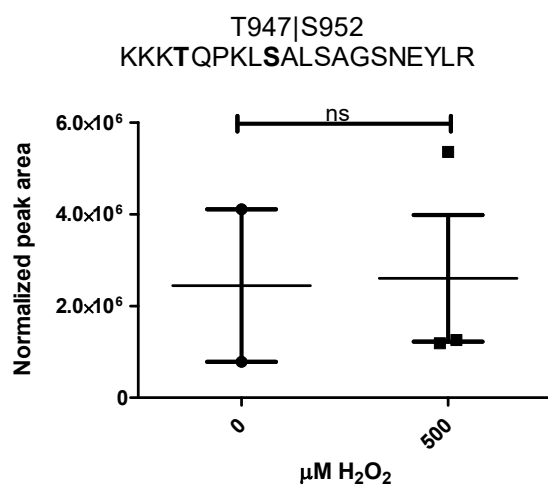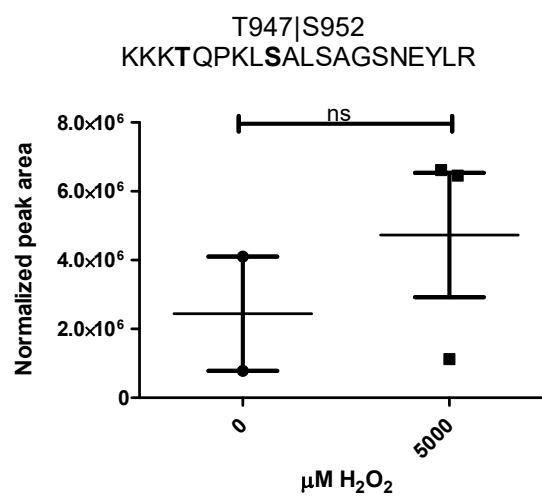

F

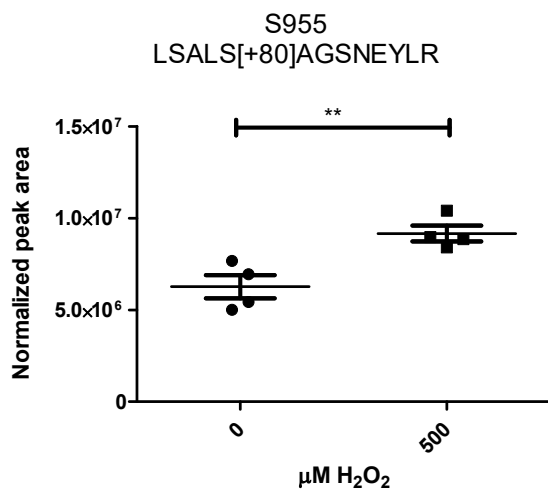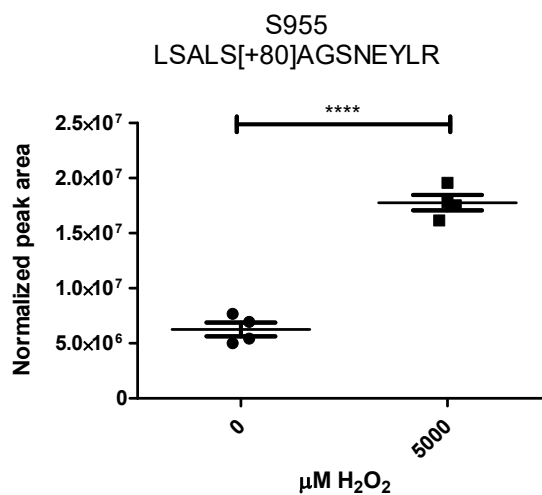

Figure S3.

G

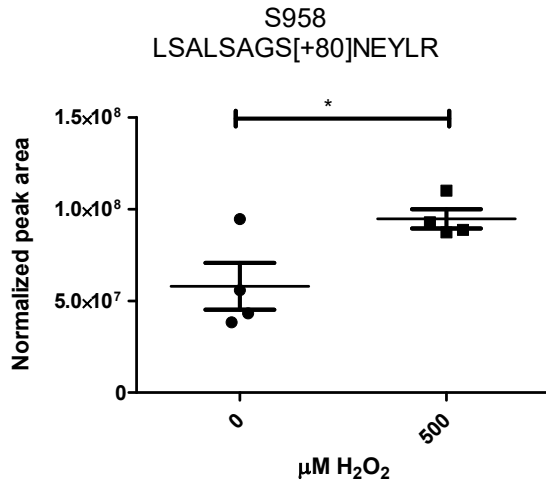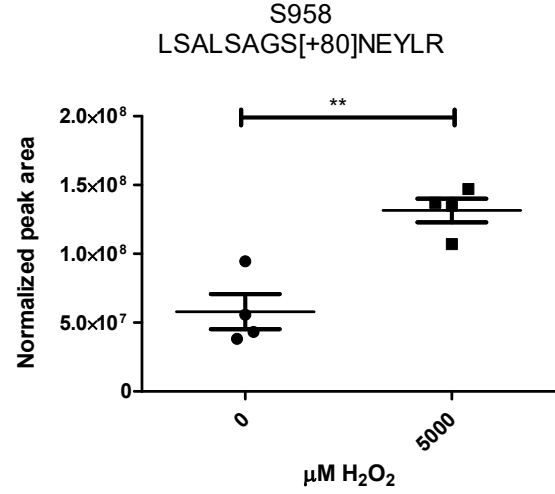

H

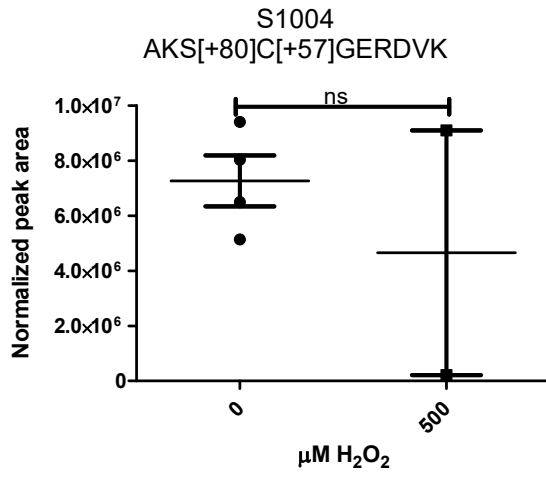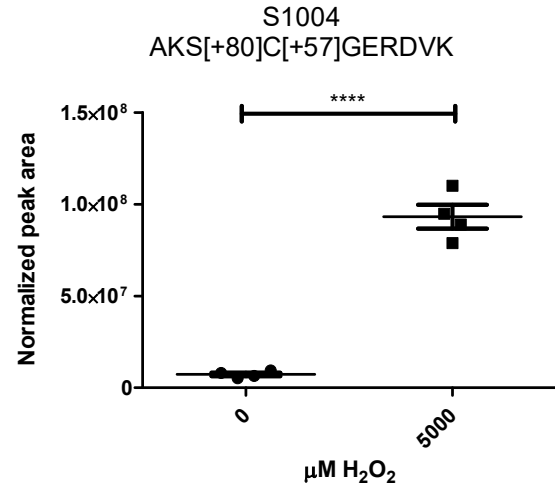

I

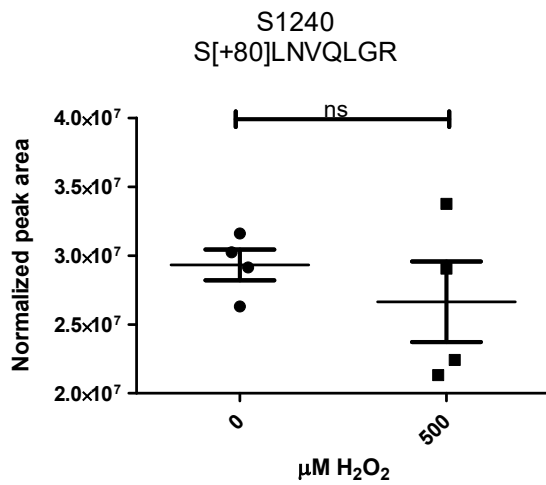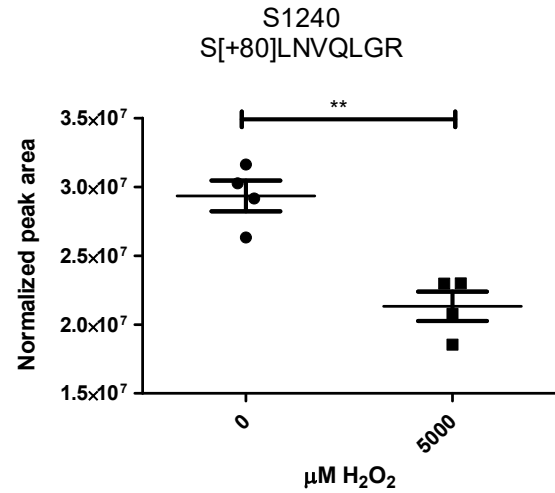

Figure S3.
